1 **Host Gut Motility and Bacterial Competition Drive Instability in a Model**  
2 **Intestinal Microbiota**

3  
4 **Short title:** Dynamics and Stability of Gut Microbiota

5  
6 Travis J. Wiles<sup>1,6</sup>, Matthew Jemielita<sup>2,4,6</sup>, Ryan P. Baker<sup>2</sup>, Brandon H. Schlomann<sup>2</sup>,  
7 Savannah L. Logan<sup>2</sup>, Julia Ganz<sup>3,5</sup>, Ellie Melancon<sup>3</sup>, Judith S. Eisen<sup>3</sup>, Karen Guillemin<sup>1</sup>,  
8 Raghuveer Parthasarathy<sup>2,7</sup>

9  
10 <sup>1</sup>Institute of Molecular Biology, University of Oregon, Eugene, OR 97403, USA

11 <sup>2</sup>Department of Physics, University of Oregon, Eugene, OR 97403, USA

12 <sup>3</sup>Institute of Neuroscience, University of Oregon, Eugene, OR 97403, USA

13 <sup>4</sup>present address: Department of Molecular Biology, Princeton University, Princeton, NJ  
14 08544

15 <sup>5</sup>present address: Department of Integrative Biology, Michigan State University, East  
16 Lansing, MI 48824

17 <sup>6</sup>Co-first author

18 <sup>7</sup>Corresponding author: raghu@uoregon.edu

19

|    |                                |
|----|--------------------------------|
| 20 | <b><u>CONTENTS</u></b>         |
| 21 |                                |
| 22 | 3..... Abstract                |
| 23 | 4..... Introduction            |
| 24 | 8..... Results                 |
| 25 | 26..... Discussion             |
| 26 | 31..... Methods                |
| 27 | 37..... Acknowledgements       |
| 28 | 38..... References             |
| 29 | 48..... Supporting Information |

30 **Abstract**

31 The gut microbiota is a complex consortium of microorganisms with the ability to  
32 influence important aspects of host health and development. Harnessing this ‘microbial  
33 organ’ for biomedical applications requires clarifying the degree to which host and  
34 bacterial factors act alone or in combination to govern the stability of specific lineages.  
35 To address this we combined bacteriological manipulation and light sheet fluorescence  
36 microscopy to monitor the dynamics of a defined two-species microbiota within the  
37 vertebrate gut. We observed that the interplay between each population and the gut  
38 environment produced distinct spatiotemporal patterns. Consequently, one species  
39 dominates while the other experiences dramatic collapses that are well fit by a  
40 stochastic mathematical model. Modeling revealed that bacterial competition could only  
41 partially explain the observed phenomena, suggesting that a host factor is also  
42 important in shaping the community. We hypothesized the host determinant to be gut  
43 motility, and tested this mechanism by measuring colonization in hosts with enteric  
44 nervous system dysfunction due to mutation in the Hirschsprung disease locus *ret*. In  
45 mutant hosts we found reduced gut motility and, confirming our hypothesis, robust  
46 coexistence of both bacterial species. This study provides evidence that host-mediated  
47 spatial structuring and stochastic perturbation of communities along with bacterial  
48 competition drives population dynamics within the gut. In addition, this work highlights  
49 the capacity of the enteric nervous system to affect stability of gut microbiota  
50 constituents, demonstrating that the ‘gut-brain axis’ is bidirectional. Ultimately, these  
51 findings will help inform disease mitigation strategies focused on engineering the  
52 intestinal ecosystem.

## 53 **INTRODUCTION**

54 Trillions of microbial cells representing hundreds of species make up the human  
55 intestinal microbiota. This multispecies symbiont supports activities as diverse as host  
56 development, nutrient acquisition, immune system education, neural function, and  
57 defense against pathogens [1-5]. Changes in microbiota diversity and functional  
58 composition have been linked with a variety of human disorders, including obesity,  
59 colon cancer, opportunistic infection, and inflammatory bowel disease [6, 7]. A major  
60 goal of host-microbe systems biology is to clarify the ecological factors that determine  
61 microbiota integrity by meshing experimental techniques and quantitative modeling.  
62 Insights derived from such efforts will inspire the design of novel therapeutic strategies  
63 for microbiota-associated diseases.

64 An unresolved question is whether the host and microbiota function  
65 independently or together to govern the dynamics and stability of individual bacterial  
66 lineages. Addressing this requires identifying the interactions that arise within the  
67 spatially complex and heterogeneous environment of the vertebrate gut. However,  
68 progress toward this goal has been hindered due to the technical limitations associated  
69 with directly observing intestinal communities. Typical interrogation of vertebrate  
70 intestinal microbiota involves phylogenetic profiling of fecal material using high-  
71 throughput sequencing of 16S ribosomal RNA (rRNA) genes. This technique is blind to  
72 the spatial structure of microbial communities, which is known in general to strongly  
73 influence interactions [8-10] and has recently been predicted to be important for  
74 microbiota stability [11]. Sequencing-based studies also have low sensitivity to temporal  
75 structure owing to both experimental and analytic constraints. Experimentally,

76 metagenomic time-series data remain rare and cannot reach the sampling frequencies  
77 necessary to capture interactions occurring at the timescales of microbial division or  
78 intestinal flux. Analytically, sequencing data yield only relative, rather than absolute,  
79 taxonomic abundances, which severely confounds the inference of interaction networks  
80 [12, 13]. Furthermore, such methods to date have employed deterministic Lotka-  
81 Volterra models [12, 14, 15] that, even with noise terms representing measurement  
82 error, neglect the possibility of fundamentally stochastic or discontinuous interactions  
83 among constituents.

84         Because our knowledge of the factors that shape interactions within host-  
85 associated ecosystems is incomplete, contemporary theoretical models have been  
86 forced to rely on assumptions that may not realistically mirror microbe-microbe and  
87 host-microbe relationships. For example, biochemical and physical inputs from the  
88 animal host that likely act on microbial constituents are often ignored [16]. It is important  
89 to unravel the extent to which microbiota integrity is simply an intrinsic property of the  
90 microbes, which could be recapitulated *in vitro* with co-culture experiments or *in silico*  
91 with bacterial metabolic network models, or an emergent property of the host-microbe  
92 system. Developing accurate accounts of the ecological interactions that manifest within  
93 the gut will require model systems that enable manipulation of microbial colonization  
94 and measurement methods that can characterize microbial populations *in vivo* with high  
95 spatial and temporal resolution [17].

96         Toward this end, we employ here larval zebrafish as a model vertebrate host  
97 coupled with light sheet fluorescence microscopy (LSFM) [18] as a minimally invasive  
98 interrogation method to examine population dynamics within a defined gut microbiota.

99 Zebrafish larvae are highly amenable to gnotobiotic techniques and can be reared  
100 germ-free (GF) in large numbers [19]. At four days post-fertilization (dpf) larvae possess  
101 an open and functional digestive tract that is permissive to microbial colonization, the  
102 timing of which is controlled by adding bacteria to the water column. Importantly, larval  
103 zebrafish share many physiological traits with humans, including aspects of innate  
104 immunity, neurological development, and intestinal function [20]. Therefore, interactions  
105 between zebrafish and their microbial symbionts are expected to reflect analogous  
106 interactions that occur in other vertebrates. LSM, combined with the optical  
107 transparency of larval zebrafish, enables three-dimensional visualization of the entire  
108 intestine with single-bacterium resolution, rapid image acquisition to avoid blurring due  
109 to intestinal motility, and extended live imaging with low phototoxicity [21, 22]. This  
110 experimental setup provides an unprecedented opportunity to investigate ecological  
111 interactions within the vertebrate intestine at a range of spatial and temporal scales.

112 With this model system we found that an apparent competitive interaction  
113 between two species native to the zebrafish gut, *Aeromonas veronii* and *Vibrio*  
114 *cholerae*, is characterized by sudden and catastrophic collapses of the *Aeromonas*  
115 population, which appear to be driven by mechanical forces related to host intestinal  
116 motility. The differential behavior of these two species can be explained by their distinct  
117 biogeography and community architecture within the intestine. Further mapping of  
118 *Aeromonas-Vibrio* dynamics motivated a quantitative stochastic model with parameters  
119 that could be independently derived from traditional abundance measurements and  
120 image-based time-series analysis. Ultimately, this model allowed us to predict the  
121 consequences of altering the host environment through genetic disruption of the enteric

122 nervous system (ENS) via a mutation in *ret*, a gene locus associated with human  
123 Hirschsprung disease (OMIM 164761), which stabilized the *Aeromonas* population and  
124 neutralized competition with *Vibrio*. This work reveals a synergy between bacterial  
125 competition and host-mediated spatial structuring of microbiota in determining  
126 population dynamics and stability—a feature that is likely mirrored in more complex  
127 host-microbe systems such as the human gut.

128 **RESULTS**

129 ***Aeromonas* and *Vibrio* exhibit an apparent competitive interaction in the zebrafish**  
130 **gut.**

131           The intestinal microbiota of larval zebrafish is dominated by bacterial lineages  
132 belonging to the Gammaproteobacteria [23, 24]. In a prior investigation we found that  
133 two representative isolates native to the zebrafish intestinal tract, *Aeromonas veronii*  
134 strain ZOR0001, hereafter referred to as *Aeromonas*, and a *Vibrio* strain, ZWU0020,  
135 similar in 16S rRNA gene sequence to *Vibrio cholerae* and hereafter referred to as  
136 *Vibrio*, exhibit an apparent negative interaction in GF larval zebrafish, with populations  
137 of *Aeromonas* that were several orders of magnitude lower in di-associations with *Vibrio*  
138 than in mono-associations [25]. Interestingly, only a modest suppression was observed  
139 in *in vitro* competition experiments [25]. To begin to untangle the importance of host and  
140 bacterial factors in facilitating the *in vivo* interaction between *Aeromonas* and *Vibrio*, we  
141 used a succession assay in which GF larval zebrafish were first colonized by  
142 *Aeromonas* to high abundance, and then challenged by invading populations of *Vibrio*  
143 (Fig 1A).

144



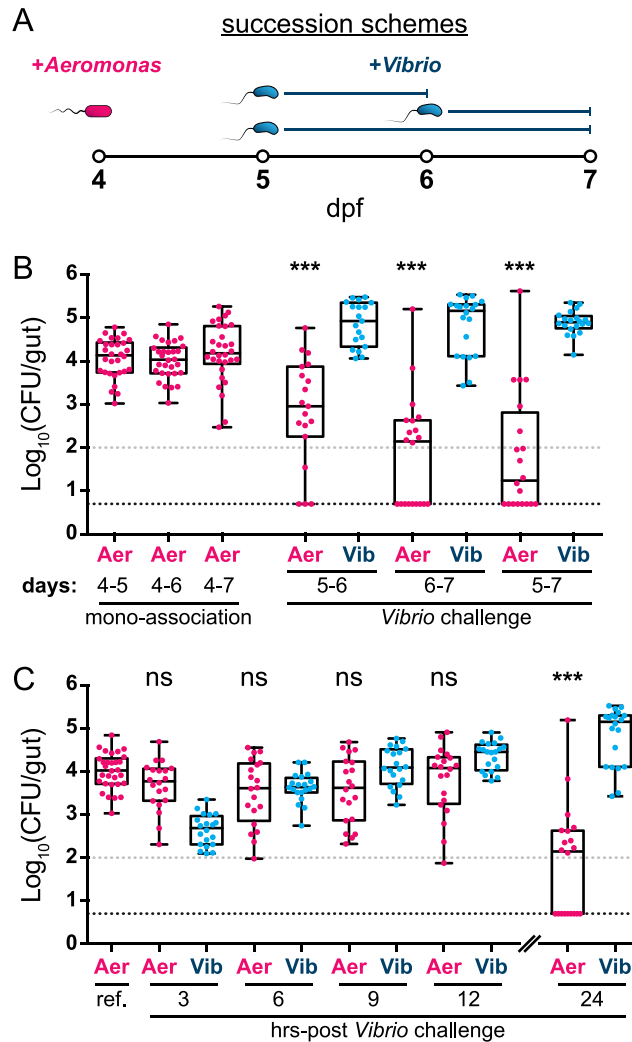

145

146

147

148

149

150

151

152

153

**Fig 1. *Aeromonas* and *Vibrio* exhibit an apparent competitive interaction within the larval zebrafish intestine.** (A) Graphical overview of succession schemes used to characterize *Aeromonas*-*Vibrio* interactions. *Aeromonas* is allowed to colonize GF larvae at 4 dpf followed by addition of *Vibrio* to the water column at 5 or 6 dpf for 24 or 48 hours prior to enumeration of abundances by dissection and serial plating techniques. (B, left) *Aeromonas* abundances after different mono-association durations and (B, right) *Aeromonas* and *Vibrio* abundances after different *Vibrio* challenge periods. Statistical significance of *Aeromonas* abundances after *Vibrio* challenge

154 compared to respective mono-association reference populations (i.e. '5-6' vs. '4-6'; '6-7'  
155 vs. '4-7'; '5-7' vs. '4-7') was determined by an unpaired t-test. (C) Time course analysis  
156 of *Aeromonas* and *Vibrio* abundances determined by dissection and plating at three-  
157 hour intervals over a 12-hour period starting at 6 dpf. Additionally plotted are an  
158 *Aeromonas* mono-association reference population and 24 hour *Aeromonas* and *Vibrio*  
159 populations previously plotted in 1B ('4-6' and '6-7', respectively). Statistical significance  
160 of *Aeromonas* abundances to the mono-association reference population (ref.) was  
161 determined by an unpaired t-test. CFU=colony-forming units; \*\*\*= $p < 0.0001$ ; ns=not  
162 significant;  $N > 19$ /condition. Gray and black dashed lines in panels B and C denote limits  
163 of quantification and detection, respectively.

164

165 We first enumerated total bacterial abundance by gut dissection and standard  
166 plating techniques. In mono-associations beginning at 4 dpf and extending 24, 48, or 72  
167 hours *Aeromonas* populations consistently reach  $10^4$  colony-forming units (CFU) per  
168 host (Fig 1B). In contrast, challenge of established *Aeromonas* populations with *Vibrio*  
169 over various 24 or 48 hour temporal windows leads to dramatically lower *Aeromonas*  
170 abundance as well as increased host-to-host variation and frequent extinction events  
171 (Fig 1B). Under these conditions *Vibrio* exhibits only modest deviations in abundance  
172 compared to mono-association (S1A and S1B Fig). Of note, *Aeromonas* populations are  
173 not destabilized upon self-challenge by newly introduced *Aeromonas*, and *Vibrio* does  
174 not induce collapses in established *Vibrio* populations (S1C and S1D Fig). These results  
175 indicate that subsequent waves of colonizing bacteria alone do not account for the  
176 observed competitive interaction and that it is inter-specific in nature. We also verified

177 that competition between *Aeromonas* and *Vibrio* is dependent on the host environment,  
178 as there was not an appreciable difference between their abundances during *in vitro*  
179 mono- and co-culture experiments (S1E Fig). To determine if the abundance of *Vibrio*  
180 correlates with a reduction of *Aeromonas* populations *in vivo*, we performed a time  
181 course experiment in which zebrafish were sacrificed and assayed every 3 hours for 12  
182 hours after inoculation with *Vibrio*. We found that *Vibrio* rapidly infiltrates *Aeromonas*-  
183 colonized intestines and steadily increases in number over the 12-hour assay period  
184 (Fig 1C). Surprisingly, we did not detect a concomitant decline in *Aeromonas*, implying  
185 that *Aeromonas* populations do not merely respond proportionally to the abundance of  
186 *Vibrio* (Fig 1C).

187

### 188 ***Aeromonas* population dynamics are altered during *Vibrio* challenge.**

189 To further explore the interactions driving *Aeromonas-Vibrio* competition, we  
190 turned to LSM. Imaging fluorescently marked variants of each species during mono-  
191 association revealed that they have noticeably different intestinal biogeographies and  
192 behavior (Fig 2). Populations of *Vibrio* largely comprise planktonic, highly motile cells  
193 that appear capable of sampling all available regions within the intestine (S1, S2, and  
194 S3 Movie). Quantifying the bacterial density along the anterior-posterior axis (Methods),  
195 we find that *Vibrio* is most abundant in the anterior bulb (Fig 2B and 2C), with an  
196 overabundance within several micrometers of the epithelial wall that may be the result  
197 of hydrodynamic interactions (S2 Fig) [26]. In contrast, *Aeromonas* is most abundant in  
198 the midgut and largely takes the form of dense, non-motile clusters with a smaller  
199 subpopulation of motile individuals (Fig 2D and 2E; S4 and S5 Movie).

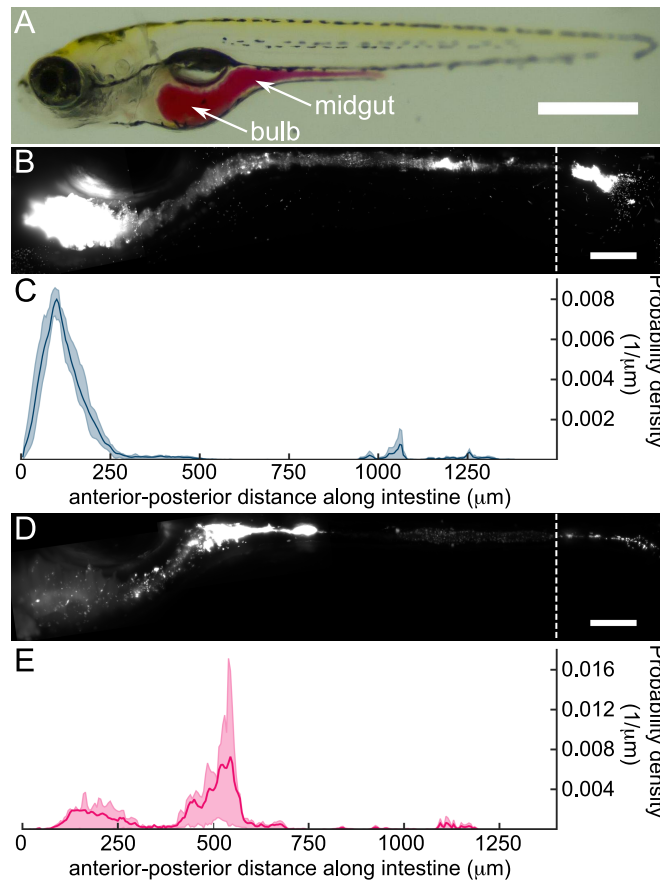

200

201 **Fig 2. *Vibrio* and *Aeromonas* have distinct community architectures and**  
 202 **biogeographies within the larval zebrafish intestine.** (A) A larval zebrafish at 5 dpf;  
 203 the intestine is highlighted by phenol red dye via microgavage [61]. Scale bar: 500 μm.  
 204 (B) A maximum intensity projection (MIP) of *Vibrio* in the larval intestine. Scale bar: 100  
 205 μm. (C) The probability density of *Vibrio* along the intestinal axis. From (B) and (C), we  
 206 see that *Vibrio* is predominantly localized in the anterior bulb. (D) MIP of *Aeromonas* in  
 207 the larval intestine. Scale bar: 100 μm. (E) The probability density of *Aeromonas* along  
 208 the intestinal axis. (D) and (E) show that *Aeromonas* is predominantly localized in the  
 209 midgut, with a smaller population in the anterior bulb.

210

211 To identify the temporal dynamics of the two-member community, we performed  
212 *in vivo* live imaging experiments using LSM starting approximately 2 hours following  
213 the challenge of established *Aeromonas* populations with *Vibrio*. Three-dimensional  
214 images spanning the intestine were obtained for each species for durations of roughly  
215 12-15 hours at 20-minute intervals, which is shorter than each species' approximate  
216 one-hour doubling time (Methods). Fig 3A shows maximum intensity projections of  
217 *Aeromonas* and *Vibrio* in a representative larval zebrafish intestine at three time points  
218 spanning a four-hour interval (S6 Movie). The abundance of each species over several  
219 hours is plotted in Fig 3B and 3C for two fish, representative of twelve fish that we  
220 examined. Similar population abundance plots for all zebrafish are provided in S3 Fig.  
221 We found that *Vibrio* populations smoothly expand and exhibit a growth rate of  $0.8 \pm 0.3$   
222  $\text{hr}^{-1}$  (mean  $\pm$  std. dev.), similar to that derived from plating data ( $0.60 \pm 0.22 \text{ hr}^{-1}$ , Fig  
223 1C). Strikingly, growth of *Aeromonas* populations is sporadically interrupted by dramatic  
224 collapse events, dropping in abundance by multiple orders of magnitude within an hour  
225 (Fig 3A, 3B, and 3C).

226

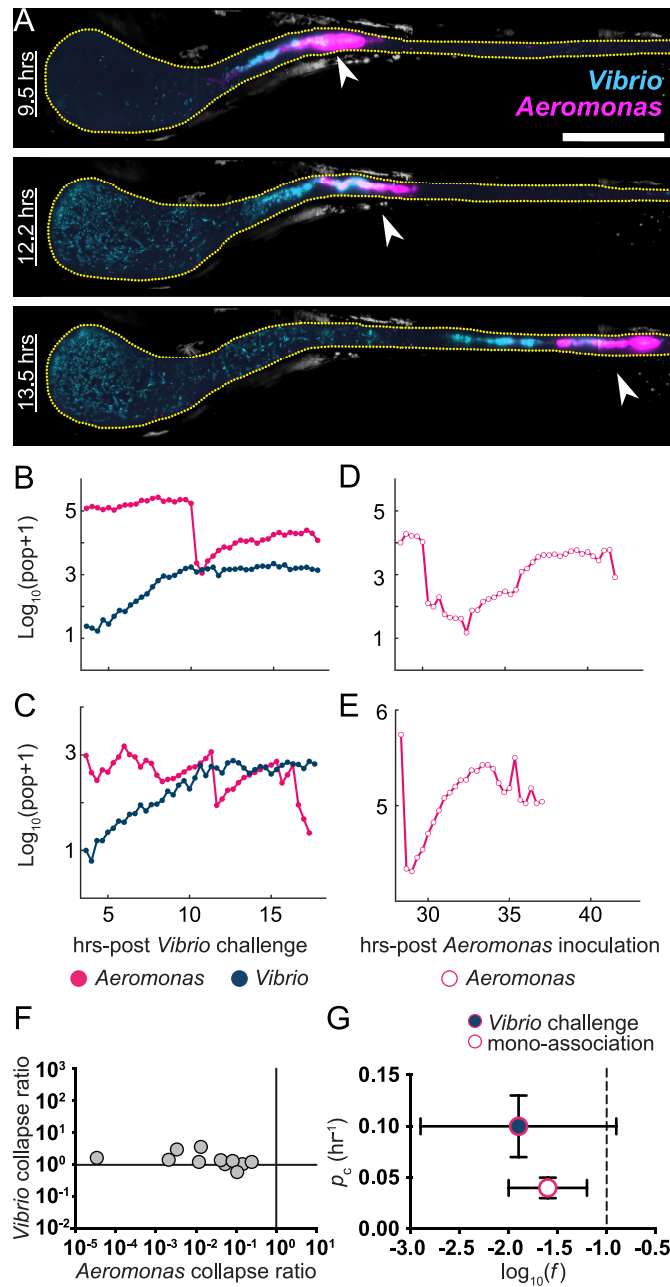

227

228 **Fig 3. *Aeromonas* populations experience collapse events during *Vibrio* challenge**

229 **and mono-association.** (A) MIPs of *Aeromonas* (magenta) and *Vibrio* (cyan) in a larval

230 zebrafish intestine. Scale bar: 200  $\mu\text{m}$ . The fish was initially colonized at 4 dpf with

231 *Aeromonas*, challenged 24 hours later by inoculation with *Vibrio*, and then imaged every

232 20 minutes for 14 hours. The times indicated denote hours post-challenge. In all

233 images, the region shown spans about 80% of the intestine, with the anterior on the left.  
234 Image contrast in both color channels is enhanced for clarity. Yellow dotted line roughly  
235 indicates the luminal boundary. As time progresses, the anterior growth of *Vibrio* as  
236 well as abrupt changes in the *Aeromonas* distribution (arrows) are evident. (B,C) Total  
237 bacterial abundance, derived from image data, for *Aeromonas* and *Vibrio* in two  
238 representative fish inoculated and challenged as in panel A, as a function of time  
239 following the *Vibrio* inoculation. Sharp drops of over an order of magnitude in the  
240 *Aeromonas* population, but not the *Vibrio* population, are evident. (D,E) Total  
241 abundance for *Aeromonas* in mono-associations as a function of time post-inoculation,  
242 in two representative fish. Collapses are also observed, though in general the  
243 populations recover to approximately pre-collapse levels. (F) The ratio,  $f$ , of the post-  
244 collapse to the pre-collapse population for *Aeromonas* challenged by *Vibrio*, which span  
245 many orders of magnitude (horizontal axis). At the same time points, the *Vibrio*  
246 populations are essentially unchanged, with ratios of post- to pre-collapse populations  
247 close to one (vertical axis). (G) Characteristics of *Aeromonas* population collapses.  
248 Circles and bars indicate the mean and standard deviation, respectively, of  $f$  and  $p_c$ , the  
249 rate of collapse occurrence, for both mono-associations and *Aeromonas* challenged by  
250 *Vibrio*. The dashed line at  $f = 0.1$  indicates the threshold for identification of collapses.  
251

252 To determine if *Aeromonas* collapses occur in the absence of *Vibrio*, we  
253 examined live imaging data of *Aeromonas* mono-associations over a similar time frame.  
254 We detected clear instances of *Aeromonas* population collapses under these conditions  
255 (Fig 3D and 3E). However, in contrast to *Vibrio*-associated collapses, *Aeromonas* was

256 found to consistently recover from collapses during mono-association. Additionally,  
257 *Aeromonas* collapse events associated with mono-association were smaller and more  
258 uniform. Defining collapses as events in which the population decreases by at least a  
259 factor of ten within one hour, and assigning their magnitude  $f$  as the ratio of the  
260 population after collapse to that before, we find that for *Aeromonas* challenged by  
261 *Vibrio*,  $\log_{10}(f) = -1.9 \pm 1.0$  (mean  $\pm$  std. dev.) (Fig 3F and 3G). The ratio of the *Vibrio*  
262 population before and after *Aeromonas* collapse events within the same fish is  
263 approximately 1 (Fig 3F), corroborating observations from imaging and plating data that  
264 *Vibrio* is resistant to the perturbations that affect *Aeromonas*. We found that during  
265 *Aeromonas* mono-associations the magnitude of collapse events was about half of that  
266 observed in the presence of *Vibrio*,  $\log_{10}(f) = -1.6 \pm 0.4$  (Fig 3G). We also detected a  
267 greater rate of *Aeromonas* collapses during *Vibrio* challenge. Estimating the collapse  
268 probability per unit time,  $p_c$ , as the total number of collapses in all fish divided by the  
269 total observation time, we find  $p_c = 0.10 \pm 0.03 \text{ hr.}^{-1}$  during *Vibrio* challenge and  $p_c =$   
270  $0.04 \pm 0.01 \text{ hr.}^{-1}$  during *Aeromonas* mono-associations (Fig 3G), where the uncertainties  
271 are estimated by assuming an underlying Poisson process.

272

### 273 ***Aeromonas* and *Vibrio* are differentially resistant to intestinal motility.**

274 We next inspected the spatial structure and dynamics of each species to uncover  
275 clues regarding possible factors driving *Aeromonas* collapses. A conspicuous feature of  
276 the larval zebrafish intestine, like most animal intestines, is that it undergoes periodic  
277 contractions that propagate along its length. We found that *Vibrio* populations, being  
278 made up of motile, planktonic individuals, are almost completely unaffected by the



279 mechanics of intestinal motility (Fig 4A). Like a liquid filling its container, populations of  
280 *Vibrio* quickly adapt to the contracting and expanding space with surprisingly little  
281 change in their distribution (Fig 4B; S3 Movie). In contrast, the rigid and largely non-  
282 motile clusters of *Aeromonas*, localized to the narrow midgut, are strongly affected by  
283 intestinal contractions (Fig 4C and 4D; S7 Movie). These observations support the  
284 hypothesis that forces exerted on this two-member community by intestinal motility give  
285 rise to rare and stochastic expulsion of *Aeromonas* while leaving *Vibrio* unperturbed.  
286 Corroborating this notion, we indeed observe posterior transport of *Aeromonas* in  
287 collapse events during live imaging experiments (Fig 3A; S6 Movie).

288

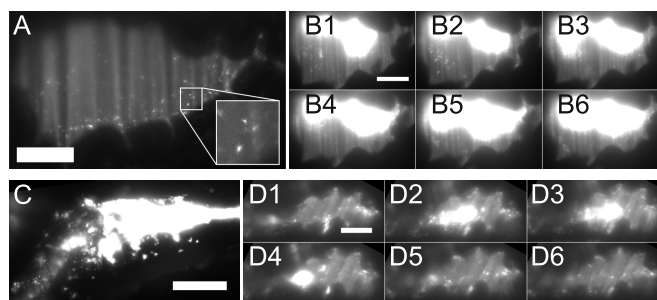

289

290 **Fig 4. *Aeromonas* and *Vibrio* exhibit different dynamics within the zebrafish**  
291 **intestine.** (A) An optical section of *Vibrio* mono-associated with a larval zebrafish,  
292 showing the anterior bulb region. The population consists of discrete, highly motile  
293 individuals. (B) A montage of images from a time-series of *Vibrio* in the bulb, during  
294 which the overall distribution of the population remains stable. Time between frames: 1  
295 second. (C) An optical section of the midgut of *Aeromonas* mono-associated with a  
296 larval zebrafish. Dense clusters are evident. (D) A montage of images from a time-  
297 series of *Aeromonas* in the midgut, during which the overall distribution of the  
298 population changes considerably. Time between frames: 1 second. Scale bars: 50  $\mu$ m.

299

300 *Aeromonas* collapses occur with or without the presence of *Vibrio*, but these  
301 collapses have different significance in the two cases for the overall *Aeromonas*  
302 abundance. One can imagine several possible explanations for this. We first asked  
303 whether the growth rate of *Aeromonas* post-collapse is lower if *Vibrio* is present. The  
304 data show that this is not the case. Mono-associated *Aeromonas* have a post-collapse  
305 growth rate of  $0.74 \pm 0.1 \text{ hr.}^{-1}$  (mean  $\pm$  std. dev.,  $N=5$  collapses), whereas *Vibrio*-  
306 challenged *Aeromonas* have  $0.64 \pm 0.2 \text{ hr.}^{-1}$  ( $N=4$  collapses). We next asked whether  
307 the presence of *Vibrio* leads to changes in the mechanics of intestinal motility. To test  
308 this, we imaged intestinal motility in larval zebrafish using differential interference  
309 contrast microscopy (DIC) [27] and calculated the dominant period and amplitude of  
310 intestinal contractions. Comparing GF fish with *Vibrio* or *Aeromonas* mono-associated  
311 fish, or fish in which *Aeromonas* is challenged after 24 hours by *Vibrio*, there is no  
312 notable difference in period or amplitude (S4 Fig). The consequences of intestinal  
313 motility on *Aeromonas* collapse properties are clearly different in the mono-association  
314 and challenge cases, however, as indicated by changes in collapse magnitudes and  
315 rates ( $f$  and  $p_c$ ). We also note that during challenge experiments, the gross spatial  
316 distribution of *Vibrio* is similar to its distribution during mono-association, while there is  
317 considerable broadening in the spatial distribution of *Aeromonas* when challenged (S5  
318 Fig). Finally, a conceptually minimal model of interaction is that with *Vibrio* present, the  
319 resources available to *Aeromonas* post-collapse are less than with *Vibrio* absent,  
320 thereby placing a limit on its potential for recovery. We assess this possibility

321 quantitatively below by estimating carrying capacities, and we also examine the  
322 synergistic consequences of changes to the carrying capacity and collapse properties.

323

324 **Synergy between stochastic collapse events and competition with *Vibrio***  
325 **underlies *Aeromonas* population dynamics.**

326 Thus far our data suggest that *Aeromonas* is susceptible to stochastic  
327 disturbances mediated by host intestinal motility, and that its recovery from these  
328 disturbances is altered in the presence of *Vibrio*. If this is the case, we should be able to  
329 build a quantitative model that reflects these data, explains the high variance observed  
330 in plating assays (Fig 1), and offers insights into the differential outcomes between  
331 mono-association and challenge experiments. The model we construct is illustrated  
332 schematically in Fig 5. Consider a bacterial species exhibiting logistic growth, with  
333 growth rate  $r$  and carrying capacity  $K$  (Fig 5A and 5B); in other words, the population  $N$   
334 grows with time  $t$  according to:

$$\frac{dN(t)}{dt} = rN(t) \left(1 - \frac{N(t)}{K}\right).$$

335 Superimposed on this are rare collapses, during which the population drops to  $f$  times  
336 its pre-collapse value, where  $f$  is between 0 and 1, and after which it resumes logistic  
337 growth (Fig 5C). The collapses are stochastic and modeled as Poisson processes; i.e.  
338 they occur at random with some probability per unit time  $p_c$  (Fig 5D). This model arises  
339 in many ecological contexts, and some of its mathematical properties have been  
340 explored in various studies [28]. Of course, this model incorporates stochastic  
341 population collapses by construction, and so does not predict them from first principles.  
342 However, the parameter values that emerge from fitting such a model to the data can,

343 as shown below, yield quantitative insights into the mechanisms underlying the  
344 observed dynamics that are not evident from mere visual inspection of the raw data.

345

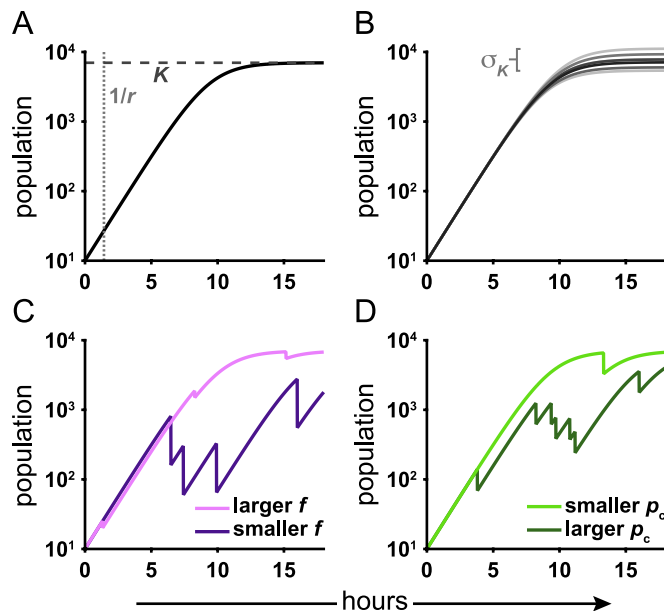

346

347 **Fig 5. Schematic of a model of growth punctuated by collapses.** (A) The model is  
348 based on simple logistic growth, which is characterized by two parameters, the growth  
349 rate,  $r$ , and carrying capacity,  $K$ . (B) We also include a parameter characterizing  
350 variability in the carrying capacity. Stochastic collapses are governed by two  
351 parameters: (C) the fraction of the population remaining after a collapse,  $f$ , and (D) the  
352 probability per unit time of a collapse,  $p_c$ .

353

354 Simulating ensembles of populations that exhibit the above dynamics, we  
355 examine the mean and, importantly, the standard deviation of the population at discrete  
356 terminal time points, as these are statistics that allow direct comparison to results from  
357 plating assays. As shown in detail in the Supporting Text (S1 Text), the apparent  
358 dependence of the model on the parameters,  $r$ ,  $K$ ,  $p_c$ , and  $f$ , collapses to two effective

359 parameters. The growth rate,  $r$ , is both independently known and irrelevant for the  
360 conditions considered, and the dynamics depend on the combination  $z = -p_c \log_{10}(f)$   
361 rather than on  $p_c$  and  $f$  independently. Values of the two remaining relevant parameters,  
362  $K$  and  $z$ , which characterize the carrying capacity and the collapse dynamics,  
363 respectively, determine the model predictions for the mean and variance of populations.  
364 A grid search through the  $(K, z)$  space for the values that minimize the distance  
365 between the predicted and observed *Aeromonas* population statistics gives the best-fit  
366 model parameters. Additional details and discussion are provided in the Supporting Text  
367 (S1 Text). It is important to note that because our imaging data revealed that  
368 *Aeromonas* is often in a state of experiencing or recovering from collapse events, the  
369 observed population is likely never close to  $K$ , and thus we cannot simply use the mean  
370 of the bacterial abundance to estimate  $K$ . Rather, we must use a model to infer the  
371 carrying capacity that would yield the observed populations.

372         Using *Aeromonas* abundance data obtained by gut dissection and plating 24  
373 hours post *Vibrio* challenge (Fig 1B, '6-7'), we find best-fit parameters  $\log_{10}(K) = 3.2 \pm$   
374  $0.5$  and  $z = 0.13 \pm 0.05 \text{ hr}^{-1}$ , the latter providing a constraint on  $p_c$  and  $f$  together. We  
375 can *independently* estimate  $p_c$  and  $f$  from imaging-derived data (Fig 3). As noted  
376 previously, for *Aeromonas* challenged by *Vibrio*, we find  $p_c = 0.10 \pm 0.03 \text{ hr}^{-1}$  and  
377  $\log_{10}(f) = -1.9 \pm 0.3$  (mean  $\pm$  std. error), yielding  $z = 0.19 \pm 0.06 \text{ hr}^{-1}$ , which is consistent  
378 with the plating-derived value. The agreement between the separately determined  
379 measures of  $z$  is remarkable, as it indicates that the statistical properties inferred from  
380 an ensemble of populations at a discrete time point are consistent with the properties  
381 inferred from the temporal dynamics within individual hosts. As expected,  $\log_{10}(K)$  is

382 greater than the observed mean *Aeromonas* abundance at 24 hours, since the model-  
383 derived  $K$  represents an upper bound for the population in the absence of any  
384 stochastic collapses or *Vibrio* competition. As another test of consistency, we note that  
385 simulating our stochastic model for 48 hours post-challenge using the best-fit  
386 parameters determined from plating experiments 24 hours post-challenge predicts a  
387 mean and standard deviation of  $\log_{10}(\text{population}+1)$  of  $1.3 \pm 0.3$  and  $1.5 \pm 0.2$ ,  
388 respectively, in agreement with the observed plating values of  $1.7 \pm 0.3$  and  $1.6 \pm 0.3$   
389 (Fig 1B). All of these assessments support the conclusion that the observed population  
390 dynamics are governed by a mechanism of stochastic collapse.

391 We can also apply this model to *Aeromonas* mono-association data. Here, the  
392 variance of the plating-derived populations is small (Fig 1B), likely due to comparatively  
393 rare and/or weak collapses as discussed earlier. For reasons described in detail in the  
394 Supporting Text, this hinders robust determination of  $z$ , though  $K$  remains well fit. We  
395 find that  $z = 0.01 \pm 0.01 \text{ hr.}^{-1}$  and  $\log_{10}(K) = 4.2 \pm 0.1$ . From live imaging data,  $p_c = 0.04$   
396  $\pm 0.01 \text{ hr.}^{-1}$  and  $\log_{10}(f) = -1.6 \pm 0.2$ , from which  $z = 0.06 \pm 0.02 \text{ hr.}^{-1}$  (S1 Text). Our  
397 identification of thresholds is, by construction, only sensitive to collapses of a factor of  
398 10 or more in magnitude (i.e.  $\log_{10}(f) \leq -1$ ), so our estimate of  $f$ , and therefore  $z$ , is  
399 biased toward larger values.

400 The above analysis yields insights into the nature of the competition between  
401 *Aeromonas* and *Vibrio* that are not obvious from simple visual inspection of the data.  
402 The carrying capacity ( $K$ ) experienced by *Aeromonas*, as estimated by our model, is  
403 only one order of magnitude lower in the presence of *Vibrio* ( $\log_{10}(K) = 3.2 \pm 0.5$ ) than  
404 when *Vibrio* is absent ( $\log_{10}(K) = 4.2 \pm 0.1$ ). However, the observed abundance of

405 *Aeromonas* is suppressed by more than two orders of magnitude:  
406  $\text{mean}(\log_{10}(\text{population}+1)) = 1.7 \pm 0.3$  and  $4.1 \pm 0.1$  when challenged by *Vibrio* and  
407 mono-associated, respectively (Fig 1B). These results suggest that the combined effect  
408 of stochastic collapses, which are likely driven by the host environment, and a reduced  
409 carrying capacity, as a result of competition with *Vibrio*, has a far greater influence on  
410 population dynamics than either mechanism would provide alone.

411  
412 **Mutant hosts lacking enteric nervous system function stabilize *Aeromonas* in the**  
413 **face of *Vibrio* challenge.**

414 Together, our experimental data and quantitative predictions indicate that a  
415 synergy between competition with *Vibrio* and host-mediated stochastic disturbances  
416 underlies the destabilization of *Aeromonas* populations within the larval zebrafish  
417 intestine. Our model predicts that if the host factor intestinal motility were reduced,  
418 *Aeromonas* populations would be more stable despite the presence of *Vibrio*. To test  
419 this hypothesis, we carried out succession assays in mutant zebrafish hosts essentially  
420 lacking a functional enteric nervous system (ENS) because of disruption of the gene  
421 encoding the *Ret* tyrosine kinase, which is critical for ENS development [29]. Using DIC  
422 microscopy to assess intestinal motility, we found that *ret* mutant larvae (*ret*<sup>-/-</sup>) still  
423 exhibit rhythmic contractions, but with different characteristics than wild-type (*ret*<sup>+/+</sup>) and  
424 heterozygous siblings (*ret*<sup>+/-</sup>) (S8 and S9 Movie). Because we observed that *ret*<sup>+/+</sup> and  
425 *ret*<sup>+/-</sup> animals are phenotypically similar with regard to gut motility and that the  
426 *ret*<sup>hu2846</sup> mutant allele is recessive we further designate *ret*<sup>+/+</sup> and *ret*<sup>+/-</sup> as 'wild type'.  
427 Computational analysis of time-series DIC images allows quantification of the

428 displacement of intestinal tissue during contractile waves (Methods). The average peak  
429 amplitude of longitudinal contractions is greater in wild-type than in *ret* mutant larvae,  
430 and in both genotypes declines with age (Fig 6A). At 6 dpf a considerable fraction of *ret*  
431 mutant larvae show low amplitudes, similar to the quiescent state observed in both  
432 genotypes at 7 dpf (Fig 6A). Though the amplitude of intestinal contractions might not  
433 be directly related to the magnitude or rate of *Aeromonas* collapse events, it is  
434 reasonable to expect some monotonic relationship between the two, as they both reflect  
435 intestinal activity. Therefore, we would expect to observe stabilization of *Vibrio*-  
436 challenged *Aeromonas* populations in *ret* mutant hosts only during challenge periods  
437 starting at 6 dpf when the difference in intestinal motility between the genotypes is  
438 greatest. Indeed, *Vibrio* challenge of established *Aeromonas* populations between 5 and  
439 6 dpf yielded the same decrease in *Aeromonas* abundance in both *ret* mutant hosts and  
440 wild types (Fig 6B). In contrast, *Aeromonas* populations were significantly stabilized  
441 during *Vibrio* challenge from 6 to 7 dpf in *ret* mutant hosts and in fact were statistically  
442 indistinguishable from a reference *Aeromonas* mono-association (Fig 6B). These results  
443 provide strong evidence that ENS-driven intestinal motility contributes to the shaping of  
444 this model two-member community by facilitating their apparent competitive interaction.

445



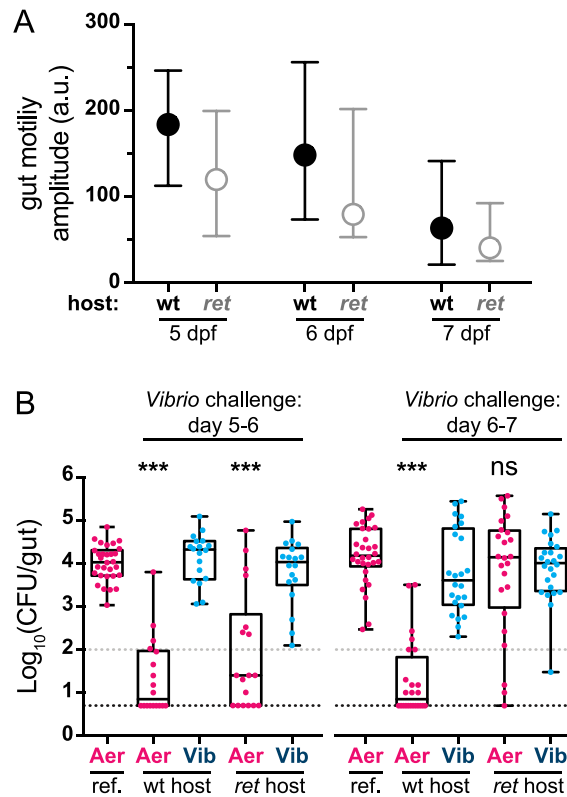

446

447 **Fig 6. Intestinal motility and bacterial competition are altered in *ret* mutant**

448 **zebrafish hosts.** (A) Amplitudes of periodic contraction along the intestine for wild-type

449 and *ret* mutant zebrafish at various ages. Circles indicate medians and bars indicate

450 first and third quartiles. (B) GF wild-type and *ret* heterozygous hosts (wt) were raised

451 together with *ret* homozygous mutant hosts (*ret*) and colonized at 4 dpf with

452 *Aeromonas*. At 5 (left) or 6 (right) dpf *Vibrio* was added to the water column for 24 hours

453 prior to whole gut dissection and serial plating to enumerate bacterial abundances.

454 Additionally plotted are respective *Aeromonas* mono-association reference (ref.)

455 populations from Fig 1B (left, '4-6'; right, '4-7'). The difference between *Aeromonas*

456 abundance during challenge and mono-association was determined by an unpaired t-

457 test. CFU=colony-forming units; \*\*\*=p<0.0001; ns=not significant; N>18/condition. Gray

458 and black dashed lines denote limits of quantification and detection, respectively.

459 **DISCUSSION**

460 A better understanding of the factors that influence the dynamics and stability of host-  
461 associated microbial communities would allow insights into their assembly [30-32],  
462 fluctuations during periods of normal health [12, 14, 15, 33, 34], and responses to  
463 perturbation [35, 36], as well as aid the development of diagnostic and treatment  
464 strategies for human diseases [17]. Building a working knowledge of these processes  
465 has been impeded by the technical difficulties associated with examining bacterial  
466 populations within their native host environments. In humans, the approach generally  
467 taken has been to infer inter-species interactions from coarsely sampled sequencing-  
468 based metagenomic time-series experiments performed on fecal samples [12-14, 34,  
469 37]. However, such procedures largely disregard spatial information and generally  
470 assume particular functional forms for interactions (e.g. deterministic Lotka-Volterra  
471 dynamics [12, 14, 15]). Moreover, measurement noise and missing information about  
472 absolute abundances in metagenomic data place severe limits on the quantitative  
473 determination of interaction strengths, even if the models are accurate descriptors of the  
474 microbial systems [12]. Therefore, basic questions regarding inter-species competition  
475 in the intestine, particularly the extent to which it is determined by the microbes  
476 themselves, properties of the host environment, or a combination of the two, remain  
477 largely unanswered.

478 For these reasons we set out to investigate bacterial population dynamics within  
479 the vertebrate intestine using a combination of absolute abundance measurements,  
480 time-series imaging, and quantitative modeling. Though our system is minimal,  
481 consisting of two bacterial species and a larval zebrafish host, it has revealed factors we

482 expect to be of broad relevance to other animal-associated microbiota. Most notably, in  
483 this model system the emergence of the apparent competition between *Aeromonas* and  
484 *Vibrio* is driven in large part by the physical activity of the host, namely the motility of the  
485 intestine. In mutant zebrafish hosts that have reduced intestinal motility due to mutation  
486 of the gene *ret*, which impairs ENS development and function, competition between  
487 these bacterial species is offset (Fig 6). Motility and mass transport are, of course, key  
488 attributes of animal intestinal tracts. The finding that the mechanical nature of the host  
489 environment has a major role in shaping bacterial communities suggests that models of  
490 microbiota based on *in vitro* competition assays or modeling of metabolic networks [16,  
491 38] will, by themselves, be insufficient for predicting and accurately describing  
492 community structure and dynamics. This is in line with the recent observation that  
493 dietary alteration of intestinal transit in a murine model can lead to compositional shifts  
494 in the gut microbiota [39]. Moreover, it provides a mechanism by which host genotype  
495 can influence community composition. Corroborating this notion, human patients with  
496 Hirschsprung disease, which is a gastrointestinal motility disorder commonly associated  
497 with mutation of *ret*, have been found to harbor dysbiotic microbial communities [40, 41].

498         The differential susceptibility of our two model bacterial species to intestinal  
499 motility can be explained by their distinct community architectures. Highly motile *Vibrio*  
500 are relatively unaffected by intestinal contractions, which is in contrast to the large, non-  
501 motile aggregates of *Aeromonas* (Fig 4). Earlier observations of a related *A. veronii*  
502 strain showed higher growth rates for aggregated bacteria compared to planktonic [21],  
503 suggesting a tradeoff between enhanced growth and resistance to population level  
504 perturbations. In general, we suspect that the spatial structure of microbial communities

505 within the intestine will be an important determinant of their dynamics and a key  
506 consideration for the generation of successful predictive models.

507         We are able to construct a quantitative model of the observed *Aeromonas*  
508 dynamics that consists of growth punctuated by stochastic collapses. Data derived from  
509 gut dissection, in which many fish are sampled at a single time point, can be fit to the  
510 model to determine its two relevant parameters, the bacterial carrying capacity,  $K$ , and a  
511 factor that characterizes the collapses,  $z$ . In itself, this is trivial. However, we can also  
512 determine  $z$  from independent, and quite different, data, namely image-based time-  
513 series of individual fish. The two measures agree, which provides strong support for the  
514 proposed stochastic-collapse-driven model of inter-species competition. Furthermore,  
515 the fit of the model to the data reveals that the impact of *Vibrio* on *Aeromonas*  
516 populations is twofold: reducing the overall carrying capacity and increasing sensitivity  
517 to physical perturbations—the combined effect of the two being much greater than  
518 either alone. More generally, our analysis provides evidence that quantitative, data-  
519 based models of interactions among species within the gut are possible, and that  
520 stochastic, rather than purely deterministic, dynamics can play a major role in shaping  
521 the composition of and competition within intestinal bacterial communities. It is  
522 interesting to note that recent metagenomic analyses of human intestinal microbiota  
523 have uncovered signatures of sudden shifts in species composition, the origins of which  
524 remain unknown [15, 42], perhaps indicating stochastic dynamics are widespread in  
525 natural intestinal systems.

526         From an ecological perspective, it is unsurprising that the physical environment  
527 and stochastic perturbations influence species abundance; these concepts are

528 mainstays of our understanding of macroscopic multi-species communities [43]. A rich  
529 literature describes various stochastic population models and the characteristics, such  
530 as extinction probabilities, that emerge from them [44-47]. As shown here, it is likely that  
531 such models will in general be useful for providing a conceptual and predictive  
532 framework for understanding inter-species bacterial competition. Again mirroring well-  
533 established ecological concepts, we can frame our understanding of *Vibrio* and  
534 *Aeromonas* dynamics in the intestine as a study of these species' differential resistance  
535 and resilience to environmental perturbations. *Aeromonas* during mono-association is  
536 not resistant to disturbances related to intestinal motility, but it is resilient, able to grow  
537 to high abundances despite sporadic collapses. *Vibrio*, in contrast, is highly resistant to  
538 perturbations; it shows smooth growth unfazed by the environmental perturbations that  
539 affect *Aeromonas* (Fig 3). In the presence of *Vibrio*, both the resistance and resilience of  
540 *Aeromonas* are compromised, as the magnitude of collapses is greater and the carrying  
541 capacity to which to recover is diminished.

542         While ecological concepts can help us characterize microbial dynamics, data on  
543 microbial systems can, conversely, enhance our understanding of ecological theory.  
544 The fast generation time and high degree of reproducibility of microbial systems have  
545 allowed a variety of tests of ecological models in recent years, illuminating issues such  
546 as game-theoretic aspects of cheating [48], early warning indicators of population  
547 collapses [49], and the statistical structure of number fluctuations [50]. Although  
548 theoretical treatments of population collapses and extinction events are abundant in the  
549 ecological literature, real data with which to test them remain sparse [51], in part due to  
550 the challenges of performing high-precision field studies. We expect, therefore, that data

551 of the sort presented here, which yield collapse statistics as well as fits to stochastic  
552 models, will have utility in contexts far removed from microbiota research.

553 *Aeromonas* population collapses are well described by stochastic dynamics, but  
554 the underlying mechanism by which *Vibrio* compromises resistance and resilience of  
555 *Aeromonas* remains to be elucidated. Several possibilities exist, and are the focus of  
556 ongoing investigation. *Vibrio* may disrupt the adhesive properties of sessile bacterial  
557 communities by secreting mucinases [52], or alter the rheological properties of the  
558 intestinal environment [53]. More directly, *Vibrio* may kill *Aeromonas* via secreted  
559 factors acting as bacteriocins or contact-mediated killing through the Type VI secretion  
560 system [54-56]. Intriguingly, it is unclear whether, in the context of a larger  
561 metacommunity composed of many fish in a shared aqueous environment, *Aeromonas*  
562 is actually at a competitive disadvantage compared to *Vibrio*. Expulsions of *Aeromonas*  
563 could benefit this species by aiding dispersal and subsequent colonization of other  
564 hosts. This may, in fact, explain the observation that species of *Vibrio* and *Aeromonas*  
565 are both highly represented among conventionally raised zebrafish [31].

566 The combination of gnotobiotic manipulation and imaging-based analyses can be  
567 further elaborated in larval zebrafish, both by increasing the diversity of monitored  
568 microbial species and by examining interactions with particular aspects of the host such  
569 as its immune system [25]. As illustrated here, we expect that such studies will yield  
570 additional insights into the factors that drive the dynamics of complex, natural host-  
571 associated microbiota.

## 572 **METHODS**

### 573 **Ethics statement**

574 All experiments with zebrafish were done in accordance with protocols approved by the  
575 University of Oregon Institutional Animal Care and Use Committee and following  
576 standard protocols [57].

577

### 578 **Gnotobiotic techniques**

579 Wild-type AB or *ret* mutant (*ret1<sup>hu2846</sup>*, ZFIN ID: ZDB-ALT-070315-12) zebrafish were  
580 derived GF and colonized with bacterial strains as previously described [19]. Briefly,  
581 fertilized eggs from adult mating pairs were harvested and incubated in sterile embryo  
582 media (EM) containing 100 µg/ml ampicillin, 5 µg/ml kanamycin, and 250 µg/ml  
583 amphotericin B for ~6 hour. Embryos were then washed in EM containing 0.003%  
584 sodium hypochlorite followed by EM containing 0.1% polyvinylpyrrolidone–iodine.  
585 Sterilized embryos were distributed into T25 tissue culture flasks containing 15 ml sterile  
586 EM at a density of one embryo per ml and incubated at 28-30°C prior to bacterial  
587 colonization. Embryos were sustained on yolk-derived nutrients and not fed during  
588 experiments.

589

### 590 **Bacterial strains**

591 *Aeromonas* (ZOR0001, PRJNA205571) and *Vibrio* (ZWU0020, PRJNA205585) were  
592 isolated from the zebrafish intestinal tract and described previously [24]. Fluorescently  
593 marked derivatives used in imaging experiments were engineered with an established  
594 Tn7 transposon-based approach [58]. Briefly, a cassette containing the constitutively

595 active synthetic promoter Ptac cloned upstream of genes encoding dTomato or  
596 superfolder GFP was chromosomally inserted at the *attTn7* locus to generate  
597 *Aeromonas attTn7::Ptac-dTomato* and *Vibrio attTn7::Ptac-sfGFP*. Strains expressing  
598 fluorescent proteins did not exhibit overt fitness defects *in vitro* or *in vivo*. Prior to  
599 colonization at designated time points, bacterial strains were grown overnight in Luria  
600 Broth (LB) shaking at 30°C. Bacterial cultures were prepared for inoculation by pelleting  
601 for two minutes at 7,000 x g and washing once in sterile embryo medium (EM). An  
602 inoculum of 10<sup>6</sup> CFU/ml was used across experiments for each bacterial strain and  
603 added directly to the water column.

604

#### 605 **Culture-based quantification of bacterial populations**

606 Dissection of larval guts was done as described previously [19]. Dissected guts were  
607 harvested and placed in a 1.6 ml tube containing 500 µl sterile 0.7% saline and ~100 µl  
608 0.5 mm zirconium oxide beads (Next Advance, Averill Park, NY). Guts were then  
609 homogenized using a bullet blender tissue homogenizer (Next Advance, Averill Park,  
610 NY) for ~25 seconds on power 4. Lysates were serially plated on tryptic soy agar (TSA)  
611 and incubated overnight at 30°C prior to enumeration of CFU and determination of  
612 bacterial load. Plots depicting culture-based quantification of bacterial populations show  
613 the estimated limit of detection (5 bacteria/gut) as well as limit of quantification (100  
614 bacteria/gut) and represent pooled data from a minimum of two independent  
615 experiments.

616

#### 617 **Light sheet microscopy**



618 Imaging was performed using a home-built light sheet fluorescence microscope, based  
619 on the design of Keller et al. [18] and described in detail elsewhere [21, 22]. Briefly, a  
620 laser beam is rapidly scanned with a galvanometer mirror and demagnified to provide a  
621 thin sheet of excitation light. An objective lens mounted perpendicular to the sheet  
622 captures fluorescence emission from the optical section, and the sample is scanned  
623 along the detection coordinate to yield a three-dimensional image. To image the entire  
624 extent of the intestine (approximately 1200x300x150 microns) we sequentially image  
625 four sub-regions and computationally register the images after acquisition. The entire  
626 volume of the intestine is imaged in less than 2 minutes in two colors, with a 1-micron  
627 spacing between planes. Unless otherwise indicated in the text, all exposure times are  
628 30 ms with an excitation laser power 5 mW, as measured between the theta-lens and  
629 the excitation objective.

630

### 631 **Imaging-based quantification of bacterial populations**

632 The analysis pipeline used to estimate bacterial abundances from light sheet imaging is  
633 described in [21]. In brief, we computationally identify both individual bacteria and  
634 clusters of bacteria, and estimate the population of each cluster by dividing the total  
635 fluorescence intensity by the average intensity of individual bacteria. As necessary,  
636 objects that are falsely identified as bacterial clusters are manually removed. For  
637 example, in Fig 3A an autofluorescent signal in the intestinal midgut in the *Vibrio*  
638 channel was excluded from subsequent quantitative analysis. Additionally, individual  
639 time points during time-series are removed if, determined by manual inspection, sample

640 drift or motion of bacterial clusters driven by intestinal motility makes it infeasible to  
641 robustly estimate bacterial abundance.

642

### 643 **Identification of population collapse events**

644 Collapses in bacteria populations are objectively identified from time-series of total  
645 bacterial abundance, such as those in Fig 3, by defining a collapse as a decrease in  
646 population by at least a factor of 10 within one hour. Collapse events with pre-collapse  
647 populations of less than 100 bacteria are discarded. These criteria were manually  
648 validated by associating each identified collapse with a corresponding ejection of  
649 bacteria from the gut observed in series of images.

650

### 651 **Imaging experiments**

652 Sample mounting is done as previously described [21]. Larval zebrafish were removed  
653 from culture flasks and anaesthetized using 120 µg/ml tricaine methanesulfonate  
654 (Western Chemical, Ferndale, WA). Individual specimens were then briefly immersed in  
655 0.5% agar (maximum temperature: 42° C) and drawn into a glass capillary, which was  
656 then mounted onto a sample holder. The agar-embedded specimens were partially  
657 extruded from the capillary so that the excitation and emission optical paths did not pass  
658 through glass interfaces. The specimen holder can hold up to six samples, all of which  
659 are immersed EM maintained at 28°C, with tricaine present as an anaesthetic. All long-  
660 term imaging experiments were done overnight, beginning in the late afternoon.

661

### 662 **Measuring bacterial distance to epithelial wall**

663 Individual bacteria were identified using the same algorithms used for quantification of  
664 bacterial abundance in the intestine. As we do not have a fluorescent marker for the  
665 epithelial wall of the intestine, we use the extent of the autofluorescent mucus in images  
666 as an estimate of the location of the epithelial wall. This extent is determined by active  
667 contour segmentation using the Chan-Vese algorithm [59], using the implementation  
668 provided in MATLAB. A user-defined region is used as the seed for the segmentation of  
669 the first frame in the time-series, after which the segmentation of the previous frame is  
670 used as the seed for the segmentation of the subsequent frame. We then define the  
671 distance of each identified bacterium to the epithelial wall as the minimum distance  
672 between the location of the bacterium and the segmented extent of the intestine.

673 Distributions of distances to the epithelial wall are constructed from all video frames and  
674 confidence intervals are obtained using bootstrap resampling. A null model of a uniform  
675 prediction is obtained by randomly distributing 1000 points for each time point in the  
676 region defined by our intestinal segmentation. Confidence intervals are again obtained  
677 through bootstrap resampling.

678

### 679 **Measuring intestinal motility**

680 Larval intestinal motility was assessed from images captured using differential  
681 interference contrast (DIC) microscopy, performed as previously described [27]. The  
682 displacement field from frame to frame in time-series was determined using particle  
683 image velocimetry (PIV) algorithms [60], which calculate the motions necessary for  
684 regions in one frame to be mapped onto regions in another. We focused our analysis on  
685 the frequency and amplitude of these motions, restricting our analysis to components of

686 displacement along the intestinal axis. Fourier spectra of the displacements, averaged  
687 over location in the intestine, yielded in all cases a clear peak whose frequency and  
688 magnitude are indicative of the characteristic frequency and amplitude of intestinal  
689 motility, respectively. This method is described in greater detail in a forthcoming paper.

690 **ACKNOWLEDGEMENTS**

691 We thank Michael Taormina (University of Oregon) for experimental advice, and  
692 Brendan Bohannon (University of Oregon) and Pankaj Mehta (Boston University) for  
693 critical readings of the manuscript. For providing the zebrafish knockout allele *ret1-*  
694 *hu2846* we thank the Hubrecht laboratory and the Sanger Institute Zebrafish Mutation  
695 Project. This material is based upon work supported by the National Science  
696 Foundation under grant no. 1427957. Research reported in this publication was also  
697 supported by the National Institutes of Health, including the National Institute of General  
698 Medical Sciences (P50GM09891), the National Institute of Child Health and Human  
699 Development (P01HD22486), and the National Institute of Allergy and Infectious  
700 Diseases (F32AI112094). The content is solely the responsibility of the authors and  
701 does not necessarily represent the official views of the National Institutes of Health. We  
702 also acknowledge support from Research Corporation and the Gordon and Betty Moore  
703 Foundation.

704 **REFERENCES**

- 705 1. Cox LM, Yamanishi S, Sohn J, Alekseyenko AV, Leung JM, Cho I, et al. Altering  
706 the intestinal microbiota during a critical developmental window has lasting metabolic  
707 consequences. *Cell*. 2014;158(4):705-21. doi: 10.1016/j.cell.2014.05.052. PubMed  
708 PMID: 25126780; PubMed Central PMCID: PMC4134513.
- 709 2. Semova I, Carten JD, Stombaugh J, Mackey LC, Knight R, Farber SA, et al.  
710 Microbiota regulate intestinal absorption and metabolism of fatty acids in the zebrafish.  
711 *Cell Host Microbe*. 2012;12(3):277-88. doi: 10.1016/j.chom.2012.08.003. PubMed  
712 PMID: 22980325; PubMed Central PMCID: PMC3517662.
- 713 3. Round JL, Mazmanian SK. The gut microbiota shapes intestinal immune  
714 responses during health and disease. *Nat Rev Immunol*. 2009;9(5):313-23. doi:  
715 10.1038/nri2515. PubMed PMID: 19343057; PubMed Central PMCID: PMC4095778.
- 716 4. Goyal MS, Venkatesh S, Milbrandt J, Gordon JI, Raichle ME. Feeding the brain  
717 and nurturing the mind: Linking nutrition and the gut microbiota to brain development.  
718 *Proc Natl Acad Sci U S A*. 2015;112(46):14105-12. doi: 10.1073/pnas.1511465112.  
719 PubMed PMID: 26578751; PubMed Central PMCID: PMC4655552.
- 720 5. McKenney PT, Pamer EG. From Hype to Hope: The Gut Microbiota in Enteric  
721 Infectious Disease. *Cell*. 2015;163(6):1326-32. doi: 10.1016/j.cell.2015.11.032. PubMed  
722 PMID: 26638069; PubMed Central PMCID: PMC4672394.
- 723 6. Nicholson JK, Holmes E, Kinross J, Burcelin R, Gibson G, Jia W, et al. Host-gut  
724 microbiota metabolic interactions. *Science*. 2012;336(6086):1262-7. doi:  
725 10.1126/science.1223813. PubMed PMID: 22674330.

- 726 7. Lawley TD, Walker AW. Intestinal colonization resistance. *Immunology*.  
727 2013;138(1):1-11. doi: 10.1111/j.1365-2567.2012.03616.x. PubMed PMID: 23240815;  
728 PubMed Central PMCID: PMC3533696.
- 729 8. Rainey PB, Travisano M. Adaptive radiation in a heterogeneous environment.  
730 *Nature*. 1998;394(6688):69-72. doi: 10.1038/27900. PubMed PMID: 9665128.
- 731 9. Kim HJ, Boedicker JQ, Choi JW, Ismagilov RF. Defined spatial structure  
732 stabilizes a synthetic multispecies bacterial community. *Proc Natl Acad Sci U S A*.  
733 2008;105(47):18188-93. doi: 10.1073/pnas.0807935105. PubMed PMID: 19011107;  
734 PubMed Central PMCID: PMC2587551.
- 735 10. Hol FJ, Galajda P, Nagy K, Woolthuis RG, Dekker C, Keymer JE. Spatial  
736 structure facilitates cooperation in a social dilemma: empirical evidence from a bacterial  
737 community. *PLoS One*. 2013;8(10):e77042. doi: 10.1371/journal.pone.0077042.  
738 PubMed PMID: 24167557; PubMed Central PMCID: PMC3805552.
- 739 11. Coyte KZ, Schluter J, Foster KR. The ecology of the microbiome: Networks,  
740 competition, and stability. *Science*. 2015;350(6261):663-6. doi:  
741 10.1126/science.aad2602. PubMed PMID: 26542567.
- 742 12. Fisher CK, Mehta P. Identifying keystone species in the human gut microbiome  
743 from metagenomic timeseries using sparse linear regression. *PLoS One*.  
744 2014;9(7):e102451. doi: 10.1371/journal.pone.0102451. PubMed PMID: 25054627;  
745 PubMed Central PMCID: PMC4108331.
- 746 13. Friedman J, Alm EJ. Inferring correlation networks from genomic survey data.  
747 *PLoS Comput Biol*. 2012;8(9):e1002687. doi: 10.1371/journal.pcbi.1002687. PubMed  
748 PMID: 23028285; PubMed Central PMCID: PMC3447976.

- 749 14. Stein RR, Bucci V, Toussaint NC, Buffie CG, Ratsch G, Pamer EG, et al.  
750 Ecological modeling from time-series inference: insight into dynamics and stability of  
751 intestinal microbiota. *PLoS Comput Biol*. 2013;9(12):e1003388. doi:  
752 10.1371/journal.pcbi.1003388. PubMed PMID: 24348232; PubMed Central PMCID:  
753 PMC3861043.
- 754 15. Trosvik P, de Muinck EJ, Stenseth NC. Biotic interactions and temporal dynamics  
755 of the human gastrointestinal microbiota. *ISME J*. 2015;9(3):533-41. doi:  
756 10.1038/ismej.2014.147. PubMed PMID: 25148482; PubMed Central PMCID:  
757 PMC4331571.
- 758 16. Levy R, Borenstein E. Metabolic modeling of species interaction in the human  
759 microbiome elucidates community-level assembly rules. *Proc Natl Acad Sci U S A*.  
760 2013;110(31):12804-9. doi: 10.1073/pnas.1300926110. PubMed PMID: 23858463;  
761 PubMed Central PMCID: PMC3732988.
- 762 17. Fischbach MA, Segre JA. Signaling in Host-Associated Microbial Communities.  
763 *Cell*. 2016;164(6):1288-300. doi: 10.1016/j.cell.2016.02.037. PubMed PMID: 26967294.
- 764 18. Keller PJ, Schmidt AD, Wittbrodt J, Stelzer EH. Reconstruction of zebrafish early  
765 embryonic development by scanned light sheet microscopy. *Science*.  
766 2008;322(5904):1065-9. doi: 10.1126/science.1162493. PubMed PMID: 18845710.
- 767 19. Milligan-Myhre K, Charette JR, Phennicie RT, Stephens WZ, Rawls JF, Guillemin  
768 K, et al. Study of host-microbe interactions in zebrafish. *Methods Cell Biol*. 2011;105:87-  
769 116. doi: 10.1016/B978-0-12-381320-6.00004-7. PubMed PMID: 21951527.
- 770 20. Dooley K, Zon LI. Zebrafish: a model system for the study of human disease.  
771 *Curr Opin Genet Dev*. 2000;10(3):252-6. PubMed PMID: 10826982.



- 772 21. Jemielita M, Taormina MJ, Burns AR, Hampton JS, Rolig AS, Guillemin K, et al.  
773 Spatial and temporal features of the growth of a bacterial species colonizing the  
774 zebrafish gut. *MBio*. 2014;5(6). doi: 10.1128/mBio.01751-14. PubMed PMID: 25516613;  
775 PubMed Central PMCID: PMC4271548.
- 776 22. Taormina MJ, Jemielita M, Stephens WZ, Burns AR, Troll JV, Parthasarathy R,  
777 et al. Investigating bacterial-animal symbioses with light sheet microscopy. *Biol Bull*.  
778 2012;223(1):7-20. PubMed PMID: 22983029; PubMed Central PMCID: PMC3952068.
- 779 23. Roeselers G, Mittge EK, Stephens WZ, Parichy DM, Cavanaugh CM, Guillemin  
780 K, et al. Evidence for a core gut microbiota in the zebrafish. *ISME J*. 2011;5(10):1595-  
781 608. doi: 10.1038/ismej.2011.38. PubMed PMID: 21472014; PubMed Central PMCID:  
782 PMC3176511.
- 783 24. Stephens WZ, Burns AR, Stagaman K, Wong S, Rawls JF, Guillemin K, et al.  
784 The composition of the zebrafish intestinal microbial community varies across  
785 development. *ISME J*. 2015. doi: 10.1038/ismej.2015.140. PubMed PMID: 26339860.
- 786 25. Rolig AS, Parthasarathy R, Burns AR, Bohannan BJ, Guillemin K. Individual  
787 Members of the Microbiota Disproportionately Modulate Host Innate Immune  
788 Responses. *Cell Host Microbe*. 2015;18(5):613-20. doi: 10.1016/j.chom.2015.10.009.  
789 PubMed PMID: 26567512.
- 790 26. Drescher K, Dunkel J, Cisneros LH, Ganguly S, Goldstein RE. Fluid dynamics  
791 and noise in bacterial cell-cell and cell-surface scattering. *Proc Natl Acad Sci U S A*.  
792 2011;108(27):10940-5. doi: 10.1073/pnas.1019079108. PubMed PMID: 21690349;  
793 PubMed Central PMCID: PMC3131322.

- 794 27. Baker RP, Taormina MJ, Jemielita M, Parthasarathy R. A combined light sheet  
795 fluorescence and differential interference contrast microscope for live imaging of  
796 multicellular specimens. *J Microsc.* 2015;258(2):105-12. doi: 10.1111/jmi.12220.  
797 PubMed PMID: 25611324; PubMed Central PMCID: PMC4401621.
- 798 28. Hanson FB, Tuckwell HC. Logistic growth with random density independent  
799 disasters. *Theoretical Population Biology.* 1981;19(1):Pages 1-18.
- 800 29. Heanue TA, Pachnis V. Ret isoform function and marker gene expression in the  
801 enteric nervous system is conserved across diverse vertebrate species. *Mech Dev.*  
802 2008;125(8):687-99. doi: 10.1016/j.mod.2008.04.006. PubMed PMID: 18565740.
- 803 30. Sonnenburg JL, Angenent LT, Gordon JI. Getting a grip on things: how do  
804 communities of bacterial symbionts become established in our intestine? *Nat Immunol.*  
805 2004;5(6):569-73. doi: 10.1038/ni1079. PubMed PMID: 15164016.
- 806 31. Burns AR, Stephens WZ, Stagaman K, Wong S, Rawls JF, Guillemin K, et al.  
807 Contribution of neutral processes to the assembly of gut microbial communities in the  
808 zebrafish over host development. *ISME J.* 2015. doi: 10.1038/ismej.2015.142. PubMed  
809 PMID: 26296066.
- 810 32. Shafquat A, Joice R, Simmons SL, Huttenhower C. Functional and phylogenetic  
811 assembly of microbial communities in the human microbiome. *Trends Microbiol.*  
812 2014;22(5):261-6. doi: 10.1016/j.tim.2014.01.011. PubMed PMID: 24618403; PubMed  
813 Central PMCID: PMC4008634.
- 814 33. Rajilic-Stojanovic M, Heilig HG, Tims S, Zoetendal EG, de Vos WM. Long-term  
815 monitoring of the human intestinal microbiota composition. *Environ Microbiol.* 2012. doi:  
816 10.1111/1462-2920.12023. PubMed PMID: 23286720.

- 817 34. Caporaso JG, Lauber CL, Costello EK, Berg-Lyons D, Gonzalez A, Stombaugh  
818 J, et al. Moving pictures of the human microbiome. *Genome Biol.* 2011;12(5):R50. doi:  
819 10.1186/gb-2011-12-5-r50. PubMed PMID: 21624126; PubMed Central PMCID:  
820 PMC3271711.
- 821 35. Allison SD, Martiny JB. Colloquium paper: resistance, resilience, and redundancy  
822 in microbial communities. *Proc Natl Acad Sci U S A.* 2008;105 Suppl 1:11512-9. doi:  
823 10.1073/pnas.0801925105. PubMed PMID: 18695234; PubMed Central PMCID:  
824 PMC2556421.
- 825 36. Dethlefsen L, Relman DA. Incomplete recovery and individualized responses of  
826 the human distal gut microbiota to repeated antibiotic perturbation. *Proc Natl Acad Sci U*  
827 *S A.* 2011;108 Suppl 1:4554-61. doi: 10.1073/pnas.1000087107. PubMed PMID:  
828 20847294; PubMed Central PMCID: PMC3063582.
- 829 37. Faust K, Raes J. Microbial interactions: from networks to models. *Nat Rev*  
830 *Microbiol.* 2012;10(8):538-50. doi: 10.1038/nrmicro2832. PubMed PMID: 22796884.
- 831 38. Klitgord N, Segre D. Environments that induce synthetic microbial ecosystems.  
832 *PLoS Comput Biol.* 2010;6(11):e1001002. doi: 10.1371/journal.pcbi.1001002. PubMed  
833 PMID: 21124952; PubMed Central PMCID: PMC2987903.
- 834 39. Kashyap PC, Marcobal A, Ursell LK, Larauche M, Duboc H, Earle KA, et al.  
835 Complex interactions among diet, gastrointestinal transit, and gut microbiota in  
836 humanized mice. *Gastroenterology.* 2013;144(5):967-77. doi:  
837 10.1053/j.gastro.2013.01.047. PubMed PMID: 23380084; PubMed Central PMCID:  
838 PMC3890323.

- 839 40. Frykman PK, Nordenskjold A, Kawaguchi A, Hui TT, Granstrom AL, Cheng Z, et  
840 al. Characterization of Bacterial and Fungal Microbiome in Children with Hirschsprung  
841 Disease with and without a History of Enterocolitis: A Multicenter Study. PLoS One.  
842 2015;10(4):e0124172. doi: 10.1371/journal.pone.0124172. PubMed PMID: 25909773;  
843 PubMed Central PMCID: PMC4409062.
- 844 41. Gosain A, Brinkman AS. Hirschsprung's associated enterocolitis. Curr Opin  
845 Pediatr. 2015;27(3):364-9. doi: 10.1097/MOP.0000000000000210. PubMed PMID:  
846 25944307; PubMed Central PMCID: PMC4451822.
- 847 42. David LA, Materna AC, Friedman J, Campos-Baptista MI, Blackburn MC,  
848 Perrotta A, et al. Host lifestyle affects human microbiota on daily timescales. Genome  
849 Biol. 2014;15(7):R89. doi: 10.1186/gb-2014-15-7-r89. PubMed PMID: 25146375;  
850 PubMed Central PMCID: PMC4405912.
- 851 43. Sousa WP. The Role of Disturbance in Natural Communities. Annual Review of  
852 Ecology and Systematics. 1984;15: 353-91. doi:  
853 10.1146/annurev.es.15.110184.002033.
- 854 44. Ovaskainen O, Meerson B. Stochastic models of population extinction. Trends  
855 Ecol Evol. 2010;25(11):643-52. doi: 10.1016/j.tree.2010.07.009. PubMed PMID:  
856 20810188.
- 857 45. Melbourne BA, Hastings A. Extinction risk depends strongly on factors  
858 contributing to stochasticity. Nature. 2008;454(7200):100-3. doi: 10.1038/nature06922.  
859 PubMed PMID: 18596809.

- 860 46. Allen LJ, Allen EJ. A comparison of three different stochastic population models  
861 with regard to persistence time. *Theor Popul Biol.* 2003;64(4):439-49. PubMed PMID:  
862 14630481.
- 863 47. Lande R. Risks of Population Extinction from Demographic and Environmental  
864 Stochasticity and Random Catastrophes. *The American Naturalist.* 1993;142(6):911-27.
- 865 48. Gore J, Youk H, van Oudenaarden A. Snowdrift game dynamics and facultative  
866 cheating in yeast. *Nature.* 2009;459(7244):253-6. doi: 10.1038/nature07921. PubMed  
867 PMID: 19349960; PubMed Central PMCID: PMC2888597.
- 868 49. Dai L, Vorselen D, Korolev KS, Gore J. Generic indicators for loss of resilience  
869 before a tipping point leading to population collapse. *Science.* 2012;336(6085):1175-7.  
870 doi: 10.1126/science.1219805. PubMed PMID: 22654061.
- 871 50. Frentz Z, Kuehn S, Leibler S. Strongly Deterministic Population Dynamics in  
872 Closed Microbial Communities. *Physical Review X.* 2015;5(4):041014.
- 873 51. Carpenter SR, Cole JJ, Pace ML, Batt R, Brock WA, Cline T, et al. Early  
874 warnings of regime shifts: a whole-ecosystem experiment. *Science.*  
875 2011;332(6033):1079-82. doi: 10.1126/science.1203672. PubMed PMID: 21527677.
- 876 52. Szabady RL, Yanta JH, Halladin DK, Schofield MJ, Welch RA. TagA is a  
877 secreted protease of *Vibrio cholerae* that specifically cleaves mucin glycoproteins.  
878 *Microbiology.* 2011;157(Pt 2):516-25. doi: 10.1099/mic.0.044529-0. PubMed PMID:  
879 20966091; PubMed Central PMCID: PMC3090133.
- 880 53. Celli JP, Turner BS, Afdhal NH, Keates S, Ghiran I, Kelly CP, et al. *Helicobacter*  
881 *pylori* moves through mucus by reducing mucin viscoelasticity. *Proc Natl Acad Sci U S*

882 A. 2009;106(34):14321-6. doi: 10.1073/pnas.0903438106. PubMed PMID: 19706518;  
883 PubMed Central PMCID: PMC2732822.

884 54. Wexler AG, Bao Y, Whitney JC, Bobay LM, Xavier JB, Schofield WB, et al.  
885 Human symbionts inject and neutralize antibacterial toxins to persist in the gut. Proc  
886 Natl Acad Sci U S A. 2016. doi: 10.1073/pnas.1525637113. PubMed PMID: 26957597.

887 55. Basler M, Mekalanos JJ. Type 6 secretion dynamics within and between bacterial  
888 cells. Science. 2012;337(6096):815. doi: 10.1126/science.1222901. PubMed PMID:  
889 22767897; PubMed Central PMCID: PMC3557511.

890 56. Basler M, Ho BT, Mekalanos JJ. Tit-for-tat: type VI secretion system  
891 counterattack during bacterial cell-cell interactions. Cell. 2013;152(4):884-94. doi:  
892 10.1016/j.cell.2013.01.042. PubMed PMID: 23415234; PubMed Central PMCID:  
893 PMC3616380.

894 57. Westerfield M. The zebrafish book. A guide for the laboratory use of zebrafish  
895 (*Danio rerio*). 4th ed: University of Oregon Press, Eugene; 2000.

896 58. Choi KH, Gaynor JB, White KG, Lopez C, Bosio CM, Karkhoff-Schweizer RR, et  
897 al. A Tn7-based broad-range bacterial cloning and expression system. Nat Methods.  
898 2005;2(6):443-8. doi: 10.1038/nmeth765. PubMed PMID: 15908923.

899 59. Chan TFV, L.A. Active Contours Without Edges. IEEE Transactions on Image  
900 Processing. 2001;10(2):266-77. doi: 10.1109/83.902291.

901 60. Thielicke WS, E.J. PIVlab – Towards User-friendly, Affordable and Accurate  
902 Digital Particle Image Velocimetry in MATLAB. Journal of Open Research Software.  
903 2014;2(1). doi: <http://doi.org/10.5334/jors.bl>.

904 61. Cocchiaro JL, Rawls JF. Microgavage of zebrafish larvae. J Vis Exp.  
905 2013;(72):e4434. doi: 10.3791/4434. PubMed PMID: 23463135; PubMed Central  
906 PMCID: PMC3605733.

907

## SUPPORTING INFORMATION

### 908 **S1 Text. Stochastic Collapse Model**

909 We describe a simple model of growth and collapse behavior and examine its  
910 predictions for population sizes. We also fit the model to experimental data on bacterial  
911 abundance.

912

#### 913 **1 The model**

914

915 Consider a species with population  $N$  at time  $t$  that exhibits logistic growth, with  
916 growth rate  $r$  and carrying capacity  $K$ :

$$917 \quad dN = rN \left( 1 - \frac{N}{K} \right) dt, \quad \text{[Equation 1]}$$

918 We superimpose on these dynamics events in which the population collapses to a value  
919  $f$  times its pre-collapse value, where  $f$  is between 0 and 1, after which it resumes logistic  
920 growth. We model the timing of the collapses as a Poisson process: collapses are  
921 uncorrelated and stochastic, occurring with a probability per unit time  $p_c$ . Formally, one  
922 can write this as a stochastic differential equation:

$$923 \quad dN = rN \left( 1 - \frac{N}{K} \right) dt - (1 - f)N dM, \quad \text{[Equation 2]}$$

924 where  $dM$  is a Poisson process of unit step. (In other words,  $dM = 1$  with probability  $p_c dt$ ,  
925 and  $dM = 0$  with probability  $1 - p_c dt$ .)  $N dM$  refers to  $N$  immediately before the collapse.  
926 An illustration of the roles of the parameters  $r$ ,  $K$ ,  $f$ , and  $p_c$  is provided in Figure 5. As  
927 noted in the main text, this model is not new; it has been invoked and studied in many  
928 ecological contexts [S1]. However, the particular treatment presented here is, to the  
929 best of our knowledge, novel, especially with respect to determining relevant  
930 parameters for fits to experimental data. We determine statistical properties of the  
931 model using numerical simulations. For infinite carrying capacity, these properties can  
932 be calculated analytically, but for the biologically relevant case of finite carrying  
933 capacity, exact solutions do not at present exist.

934

#### 935 **2 Simulations**

936

937 The model described above is simple to simulate by numerical integration, which  
938 yields the population  $x_t$  at time  $t$ . Two typical  $x_t$  are shown in Figure ST1, with  
939 parameters as noted in the caption.

940



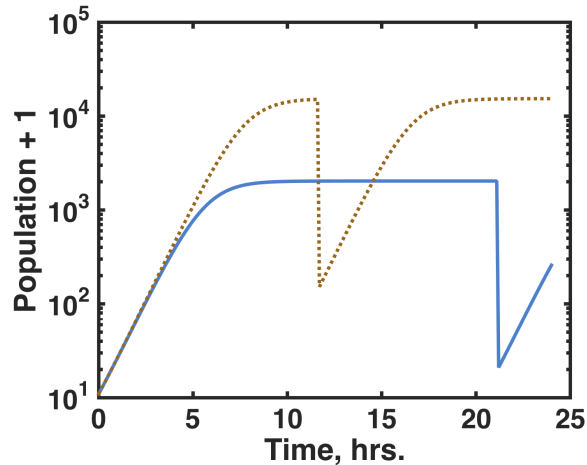

941 **Figure ST1.** Two simulated populations exhibiting stochastic  
 942 collapses, with  $f = 10^{-2}$ ,  $p_c = 0.05 \text{ hr.}^{-1}$ ,  $r = 1 \text{ hr.}^{-1}$ , and  $K$   
 943 drawn from a log-normal distribution with mean  $10^4$  and a  
 944 standard deviation of half a decade. (We plot the population  
 945 plus one so that zero values are evident on the logarithmic  
 946 scale.)  
 947  
 948

949 The model has four parameters,  $r$ ,  $K$ ,  $f$ , and  $p_c$ , and a boundary condition set by  $x_0$  (the  
 950 initial population). The value of  $x_0$  is irrelevant for the experimental conditions  
 951 considered: the populations start from a small value and grow rapidly. In our simulations  
 952  $x_0$  is taken to be 10.

953 The growth rate,  $r$ , is known from measurements. Moreover, the model dynamics  
 954 are fairly insensitive to  $r$ , since the experimental timescales of  $\sim 10$  hours are  
 955 considerably larger than the timescale set by the growth rate ( $1/r \sim 1$  hour).

956 The key determinants of the population statistics, therefore, are the collapse  
 957 properties ( $p_c$  and  $f$ ) and the carrying capacity,  $K$ . The carrying capacity may exhibit  
 958 considerable variation between fish. Typically, the final populations of *Aeromonas* in  
 959 mono-associations are found to be approximately log-normally distributed (Figure ST2),  
 960 as is commonly the case for species abundances, and so in simulations we draw  $K$  from  
 961 log-normal distributions. In other words,  $\log_{10}(K)$  for a given simulation is drawn from a  
 962 Gaussian distribution with some mean value and standard deviation  $\sigma_K$ , where  $\sigma_K$  is  
 963 typically 0.5, discussed further below. We note that in the absence of collapse (e.g.  $p_c =$   
 964  $0$  or  $f=1$ ) this model is completely deterministic, and the variance in final bacterial  
 965 populations between fish is solely due to the variance in  $K$ .

966 For particular parameter values, we simulate many instances of the above  
 967 dynamics (typically 1,000 to 10,000) and examine the statistical properties of the final  
 968 population,  $x_t$ , assessed at  $t = 24$  hours. For the values used in Figure ST1 above, for  
 969 example, the mean and standard deviation of the final  $x_t$  are  $(6.4 \pm 11.5) \times 10^3$ . The

970 distributions span orders of magnitude, including zero, so it is useful to consider the  
971 mean and standard deviation of  $\log_{10}(x_t+1)$ , similar to a geometric mean. For these  
972 parameters, this gives a mean and standard deviation of  $\log_{10}(x_t+1)$  of  $2.8 \pm 1.5$ . We will  
973 define  $y$  as

$$y = \log_{10}(x_t + 1) , \quad \text{[Equation 3]}$$

974 for notational simplicity.

976

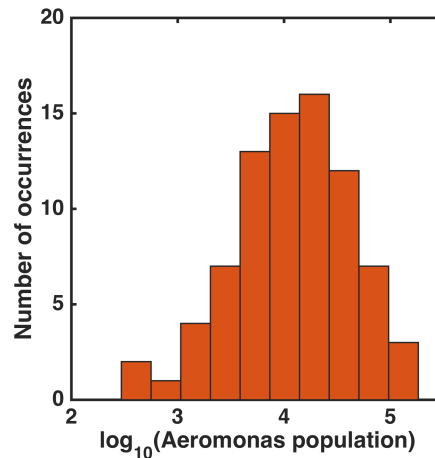

977

978

**Figure ST2.** Histogram of the final population of *Aeromonas* mono-associated with larval zebrafish at 4 dpf and assessed at days 5, 6, or 7 dpf by plating of dissected gut contents and counting of colony forming units.

981

982

### 983 **3 Parameters and Fits**

#### 984 **3.1 Dependence on $p_c$ and $f$**

985

986

987

988

989

990

991

992

993

994

995

996

997

998

We can vary the model parameters to determine the relationship between the mean and the variance of the final population, which will allow direct comparison between our model and measurements of bacterial abundance (e.g. Figure 1). The dependence of the mean and standard deviation (std.) of  $y$  on  $p_c$  and  $f$  is plotted in Figure ST3. We can intuitively understand its behavior: for small  $p_c$  or  $f$  near 1, the properties of  $x_t$  are largely set by the mean and variance of the carrying capacity. However, as  $p_c$  increases (or  $f$  decreases), the mean of  $x_t$  decreases, because larger collapses are more likely to occur, and the standard deviation of  $x_t$  increases, because the stochastic collapses play a more significant role in the dynamics. For still larger  $p_c$  (or smaller  $f$ ), the final population becomes more uniformly small, because the population is dominated by very frequent collapses and cannot grow appreciably.

Treating  $f$  as a random, rather than a fixed, parameter has little effect on the behavior of the model. Drawing  $f$  from a beta distribution, chosen because it is

999 continuous, spans [0, 1], and has two parameters that can be mapped onto a mean and  
 1000 variance, gives the curve shown in Figure ST4. The mean collapse magnitude is chosen  
 1001 over the same range as  $f$  in Figure ST3, and for each mean  $f$ , several  $f$  values are  
 1002 drawn from a beta distribution with standard deviations relative to the mean spanning [0,  
 1003 0.8]. All the resulting population characteristics are plotted in Figure ST4; the resulting  
 1004 curve is nearly identical to that of Figure ST3.  
 1005

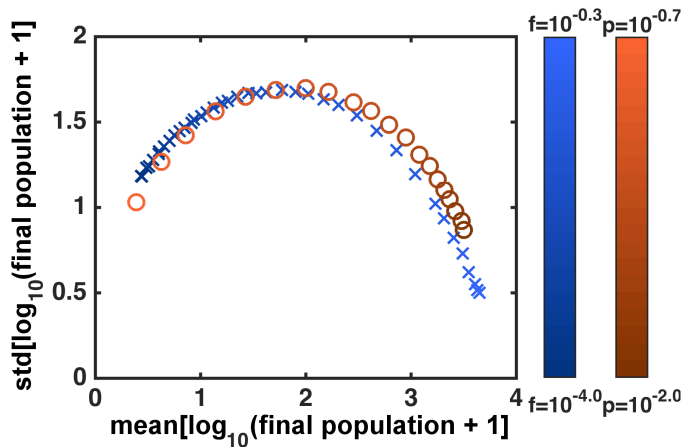

**Figure ST3.** The mean and standard deviation of simulated populations at  $t = 24$  hrs., with  $r = 0.8$  hr.<sup>-1</sup> and  $K$  drawn from a log-normal distribution with mean  $10^4$  and a standard deviation of half a decade. Blue crosses:  $p_c$  is fixed at  $= 0.1$  hr.<sup>-1</sup>, and  $f$  varies between  $10^{-4}$  and  $10^{-0.3}$ . Red circles:  $f$  is fixed at  $10^{-2}$  and  $p_c$  varies between  $10^{-2}$  and  $10^{-0.7}$  hr.<sup>-1</sup>. Each point is calculated from 10,000 simulated runs.

1006

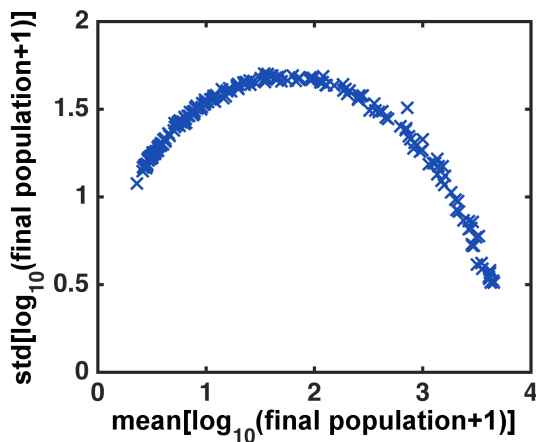

**Figure ST4.** The mean and standard deviation of simulated populations at  $t = 24$  hrs., with  $r = 1$  hr.<sup>-1</sup> and  $K$  drawn from a log-normal distribution with mean  $10^4$  and a standard deviation of half a decade. The collapse probability  $p_c$  is fixed at  $= 0.1$  hr.<sup>-1</sup>, and  $f$  is drawn from a beta distribution with mean between  $10^{-4}$  and  $10^{-0.3}$ , and relative standard deviation between 0 and 80%. Each point is calculated from 1,000 simulated runs.

1007

1008 Remarkably, at fixed  $K$ , nearly identical curves result from varying either  $p_c$  or  $f$   
 1009 (Figure ST3), suggesting that at least over the parameter ranges and timescales  
 1010 relevant to our experiments, these two parameters can be subsumed into one effective  
 1011 variable. Considering particular values of  $\text{mean}(y)$  and  $\text{std}(y)$ , where  $y$  is the logarithm of  
 1012 the population as defined above, we can search for the best-fit values of  $(p_c, f)$ , i.e. the  
 1013 parameters that minimize the squared Euclidean distance,  $\chi^2$ , between the measured  
 1014 and simulated  $(\text{mean}(y), \text{std}(y))$ . Using, for concreteness, the values determined from  
 1015 gut dissection and plating experiments of *Aeromonas* abundance 24 hours after  
 1016 challenge by *Vibrio*, namely  $(\text{mean}(y), \text{std}(y)) = (1.68 \pm 0.34, 1.50 \pm 0.24)$ , we find, as  
 1017 expected, the best-fit contours describe a curve in the  $(p_c, f)$  space (Figure ST5a).  
 1018 Empirically, we find that this curve is represented by  $-p_c \log_{10}(f) \approx \text{constant}$  (Figure  
 1019 ST5b).

1020 Fitting experimental data to this model of logistic growth with stochastic collapses  
 1021 reduces, therefore, to a two parameter fit to the carrying capacity,  $K$ , and a parameter  
 1022 describing the collapse properties, denoted as  $z$ :

$$z = -p_c \log_{10}(f) , \quad \text{[Equation 4]}$$

1024 To the best of our knowledge, this effective collapse of the two stochastic  
 1025 parameters into one effective parameter,  $z$ , has not been previously reported. We do  
 1026 not have a mathematically exact theory for its occurrence, but simply present it as an  
 1027 empirical result from our numerical simulations.

1028

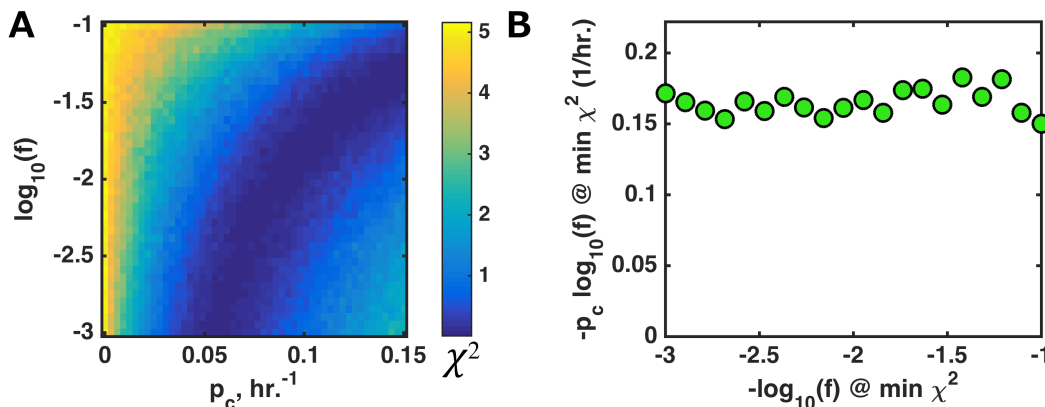

1029

1030

1031

1032

1033

1034

1035

1036

1037

**Figure ST5.** (A) Squared distance,  $\chi^2$ , between the measured and simulated  $(\text{mean}(y), \text{std}(y))$  for values derived from *Aeromonas* abundance 24 hours after challenge by *Vibrio*, namely  $(\text{mean}(y), \text{std}(y)) = (1.68 \pm 0.34, 1.50 \pm 0.24)$ , as a function of model parameters  $p_c$  and  $f$ . The carrying capacity is drawn from a log-normal distribution with mean  $10^{3.7}$  and standard deviation 0.5 decades. At each value of  $(p_c, f)$ , 1000 runs are simulated to determine  $\text{mean}(y)$  and  $\text{std}(y)$ . The optimal parameters (darkest blue) sweep out a curve in the parameter space. (B) The optimal

1038  $p_c$  and  $f$  are related by  $-p_c \log_{10}(f) \approx \text{constant}$  over the range of parameters  
1039 examined.

1040

### 1041 3.2 Parameter fits: *Aeromonas* challenged by *Vibrio*

1042

1043 Again using the *Aeromonas* 24-hour post-challenge abundance data (Figure 1),  
1044 (mean( $y$ ), std( $y$ )) = (1.68 ± 0.34, 1.50 ± 0.24), contours of  $\chi^2$  are shown in Figure ST6.

1045 The best-fit parameter values are:

1046  $z = -p_c \log_{10}(f) = 0.13 \pm 0.05 \text{ hr.}^{-1}$ ,

1047  $\log_{10}(K) = 3.2 \pm 0.5$

1048 In the simulations,  $K$  is drawn from a log-normal distribution with width 0.5 decades; the  
1049 fit is insensitive to this width, since the variance in the final population is much greater  
1050 than 0.5. The uncertainties in  $z$  and  $K$  are estimated from simulations spanning the  
1051 experimental uncertainties in mean( $y$ ) and std( $y$ ).

1052 In the main text, we compare these plating-derived measures of the collapse  
1053 parameters  $p_c$  and  $f$  to those determined from live imaging.

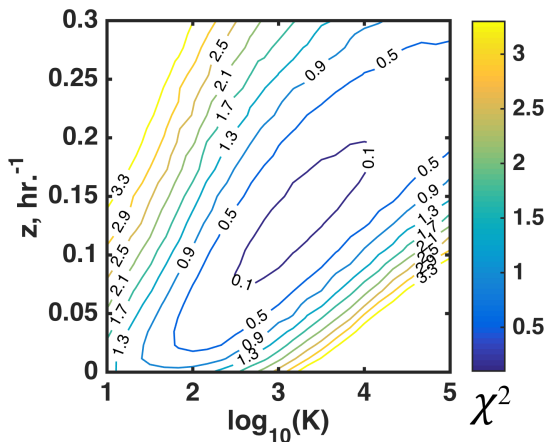

**Figure ST6.** Contours of  $\chi^2$ , the distance between simulated (mean( $y$ ), std( $y$ )) and the measured value from di-association experiments (1.68, 1.50), for a range of  $z$  and  $K$ . The fit has a clear minimum at  $z = 0.13 \text{ hr.}^{-1}$  and  $\log_{10}(K) = 3.2$ .

1054

### 1055 3.3 Parameter fits: *Aeromonas* alone

1056

1057 Similarly, we can determine the parameter values that best match *Aeromonas*  
1058 mono-association data, (mean( $y$ ), std( $y$ )) = (4.1 ± 0.08, 0.61 ± 0.05), where these values  
1059 are from plating data at both 5 and 6 days post-fertilization. Because std( $y$ ) is low, i.e.  
1060 the data map onto the lower right corner of the curve of Figures ST3-4, it is unclear  
1061 whether the variance in  $y$  is due mainly to variance in  $K$  or to the stochasticity of  
1062 collapses, and we have no independent measure of the variance in  $K$ . Considering  $K$   
1063 drawn from log-normal distributions of various widths, we find best-fit values of  $z = -$   
1064  $p_c \log_{10}(f)$  spanning roughly  $z = 0.01 \pm 0.01 \text{ hr.}^{-1}$ , i.e.  $z$  is poorly constrained. Contours of  
1065  $\chi^2$  are shown in Figure ST7. Despite this uncertainty,  $K$  is well-constrained to be  
1066 approximately  $\log_{10}(K) = 4.2 \pm 0.1$ . The significance of this is discussed in the main text.

1067

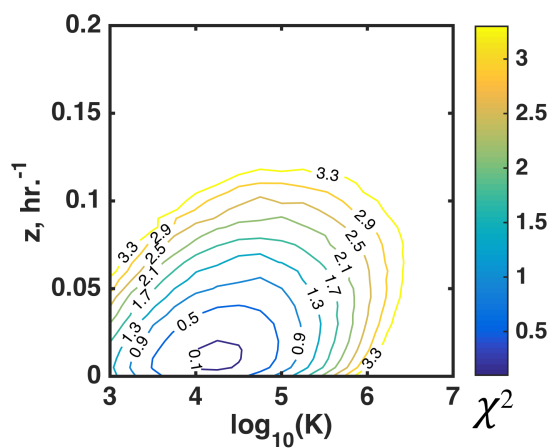

**Figure ST7.** Contours of  $\chi^2$ , the squared distance between simulated ( $\text{mean}(y)$ ,  $\text{std}(y)$ ) and the measured value from mono-association experiments (4.1, 0.6), for a range of  $z$  and  $K$ , with  $K$  drawn from log-normal distributions of width 0.1 decades.

1068

1069 **SUPPORTING REFERENCES**

1070

1071 S1. Hanson FB, Tuckwell HC. Logistic growth with random density independent  
1072 disasters. Theoretical population biology. 1981;19(1):Pages 1-18.

1073

1074

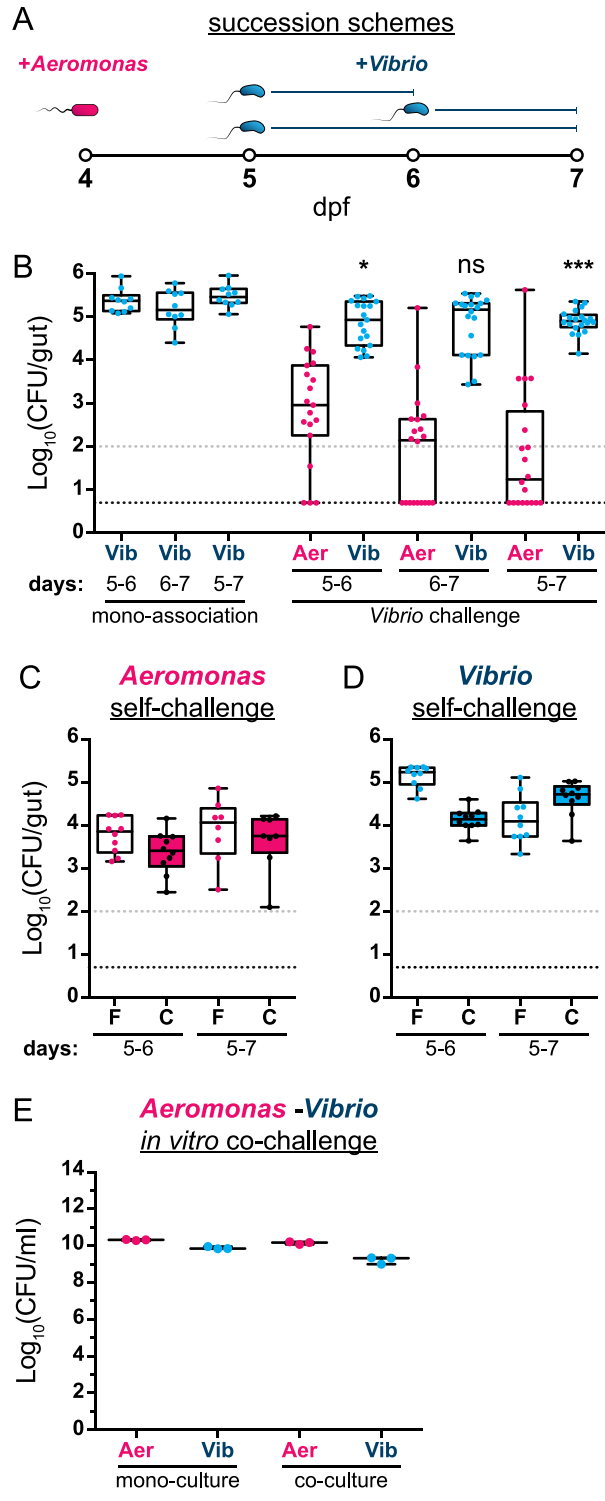



1076 **S1 Fig. *Aeromonas* and *Vibrio* exhibit an apparent competitive interaction within**  
1077 **the larval zebrafish intestine.** (A) Graphical overview of succession schemes used to  
1078 characterize *Aeromonas-Vibrio* interactions. *Aeromonas* is allowed to colonize GF  
1079 larvae at 4 dpf followed by addition of *Vibrio* to the water column at 5 or 6 dpf for 24 or  
1080 48 hours prior to enumeration of abundances by dissection and serial plating. (B, left)  
1081 *Vibrio* abundances after different mono-association durations and (B, right) *Aeromonas*  
1082 and *Vibrio* abundances after different *Vibrio* challenge periods. Statistical significance of  
1083 *Vibrio* abundances after *Vibrio* challenge compared to respective mono-association  
1084 reference populations (i.e. '5-6' vs. '5-6'; '6-7' vs. '6-7'; '5-7' vs. '5-7') was determined by  
1085 an unpaired t-test. \*=p<0.05; \*\*\*=p<0.0001; ns=not significant; N>10/condition. Founder  
1086 populations 'F' of (C) *Aeromonas* and (D) *Vibrio* were mono-associated with GF larvae  
1087 on day 4 post-fertilization and challenged by fluorescently marked self populations 'C' at  
1088 5 dpf for 24hrs ('5-6') or 48hrs ('5-7'). Dissection and serial plating was done to  
1089 enumerate founder and challenger populations. Counting of bacterial colonies was done  
1090 on a fluorescent stereomicroscope. (E) *Aeromonas* and *Vibrio* were inoculated into LB  
1091 broth either individually or 1:1 and grown overnight with shaking at 30°C prior to  
1092 enumeration by serial plating. CFU=colony-forming units. Gray and black dashed lines  
1093 in panels B, C, and D denote limit of quantification and detection, respectively.  
1094

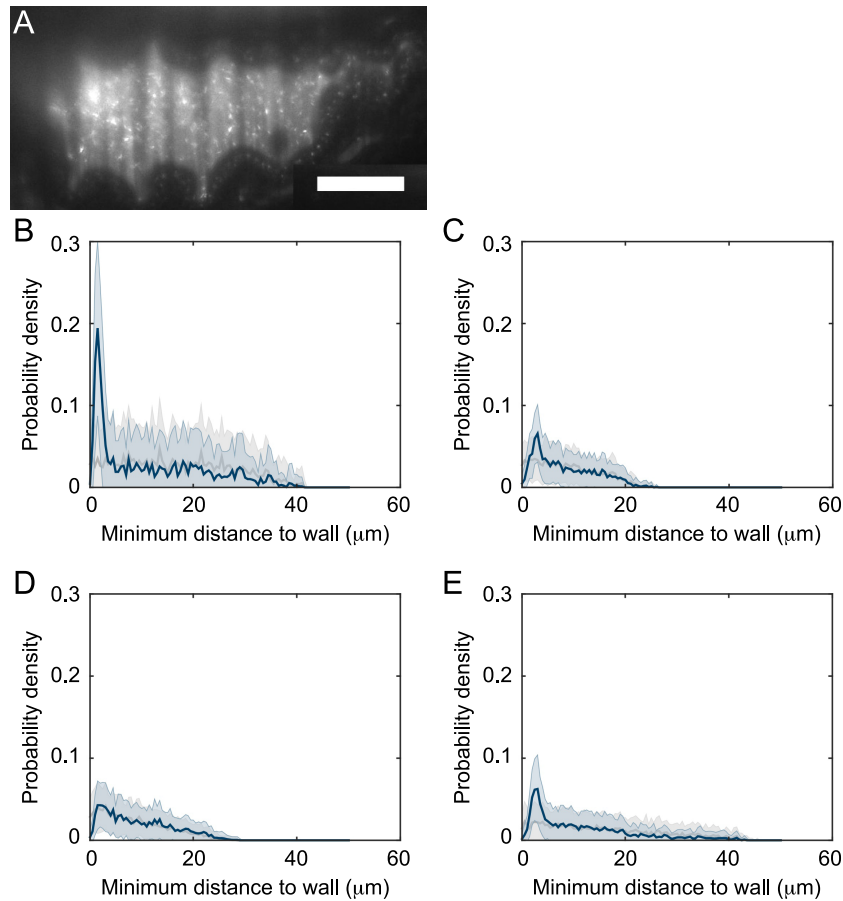

1095

1096 **S2 Fig. Space filling properties of *Vibrio* within the zebrafish gut.** (A) Single optical  
 1097 plane of 6 dpf larval zebrafish inoculated at 4 dpf with GFP-labeled *Vibrio*. Scale bar: 50  
 1098  $\mu\text{m}$ . (B-E) Blue curves: Spatial distribution of bacteria with respect to the approximate  
 1099 extent of the intestinal epithelial wall. Gray curves: prediction from a null model of  
 1100 uniform space filling. Each panel represents an individual fish with panel B being from  
 1101 the same specimen in panel A.

1102

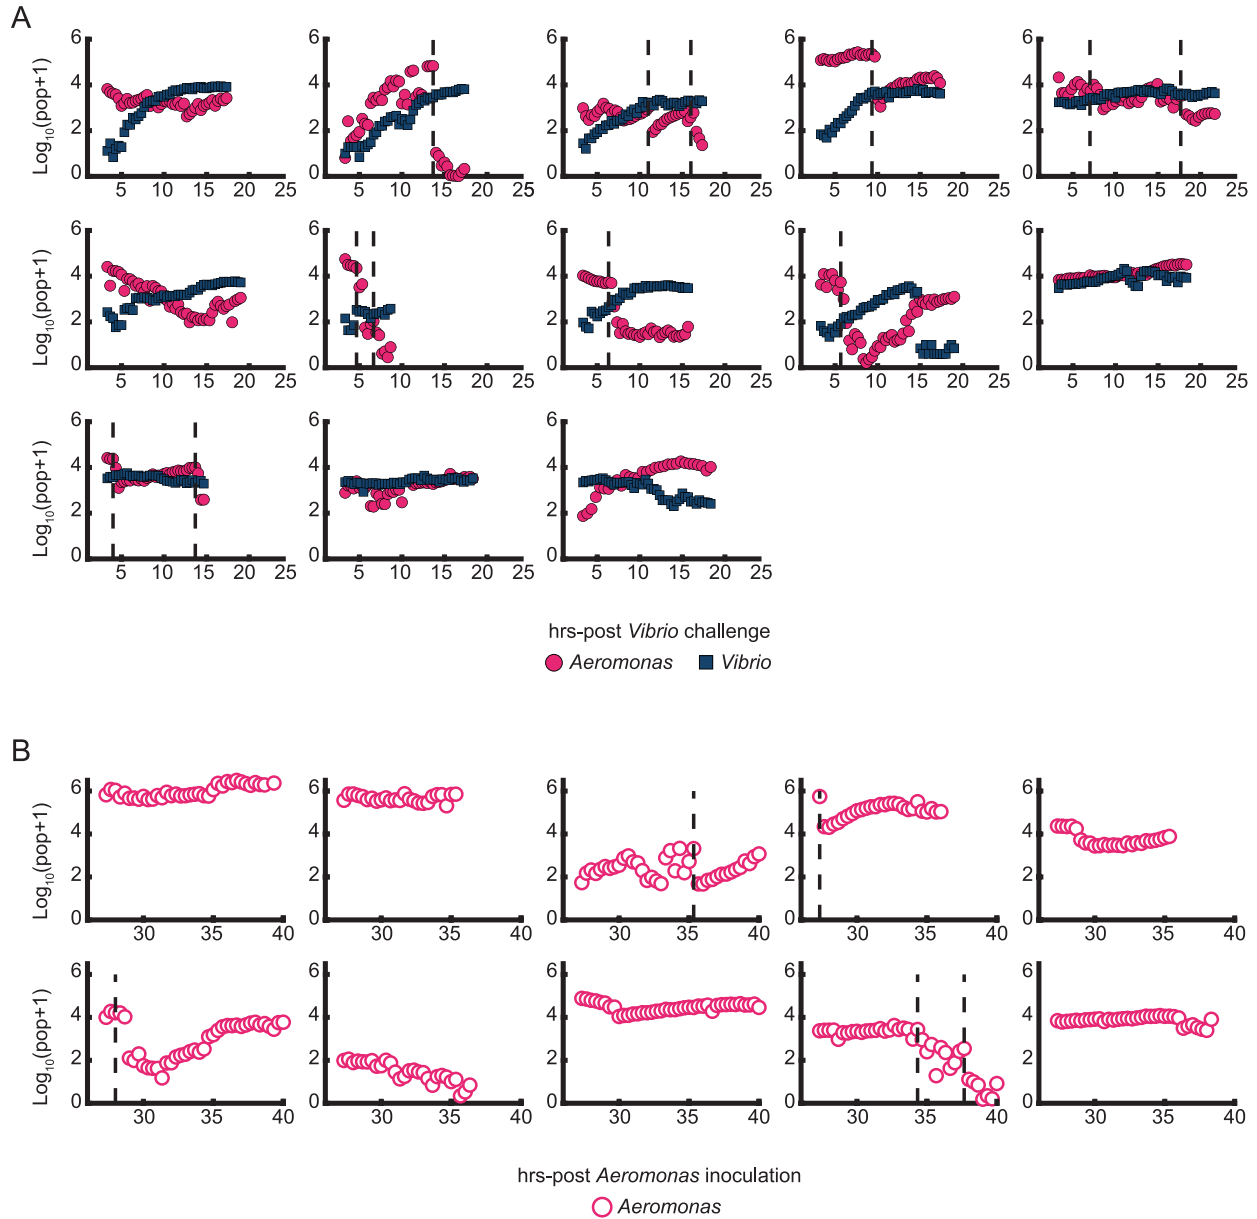

1103

1104 **S3 Fig. Collapses of *Aeromonas* populations within the zebrafish gut.** (A) Total  
 1105 bacterial abundance derived from imaging data for *Aeromonas* and *Vibrio* for all imaged  
 1106 fish ( $N=13$ ) initially inoculated for 24 hours with *Aeromonas* and then challenged by  
 1107 *Vibrio*. Plots represent individual larvae and are plotted as a function of time following  
 1108 *Vibrio* inoculation. (B) Total bacterial abundance derived from imaging data for fish  
 1109 inoculated for 24 hours with *Aeromonas* alone ( $N=10$ ). Plots represent individual larvae

1110 and are plotted as a function of time following *Aeromonas* inoculation. (A and B) Vertical  
1111 dashed lines indicate sharp drops of over an order of magnitude within an hour of the  
1112 *Aeromonas* population.  
1113

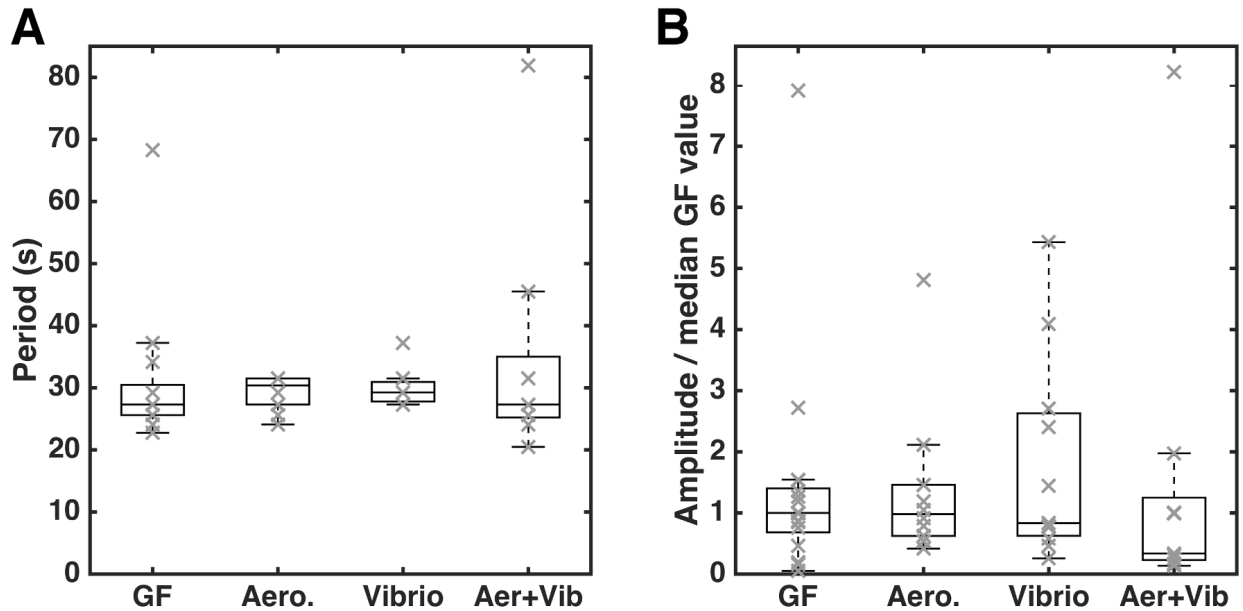

1114

1115 **S4 Fig. Characteristics of zebrafish gut motility at 6 dpf for fish with different**  
 1116 **bacterial colonization histories.** GF = germ-free; Aero = mono-association with  
 1117 *Aeromonas* from 4 dpf; Vibrio = mono-association with *Vibrio* from 4 dpf; Aer+Vib =  
 1118 mono-associated with *Aeromonas* at 4 dpf and challenged with *Vibrio* at 5 dpf. (A) The  
 1119 characteristic period of gut motility, identified as the inverse of the frequency of the peak  
 1120 signal in a Fourier spectrum of gut motion amplitudes, averaged over all positions. All  
 1121 conditions give very similar periodicity of gut motion. (B) The characteristic amplitude of  
 1122 gut motility, identified as magnitude of the peak signal in a Fourier spectrum of gut  
 1123 motion amplitudes. There is considerable variability between fish clutches, and so the  
 1124 amplitudes are normalized by the median of the germ-free fish in each batch. All  
 1125 conditions show large variance, with no significant difference evident between the  
 1126 various conditions. In A and B, gray “X”s are from individual fish; boxes indicate the first  
 1127 to third quartiles, and the horizontal bars in boxes indicates the median value.

1128

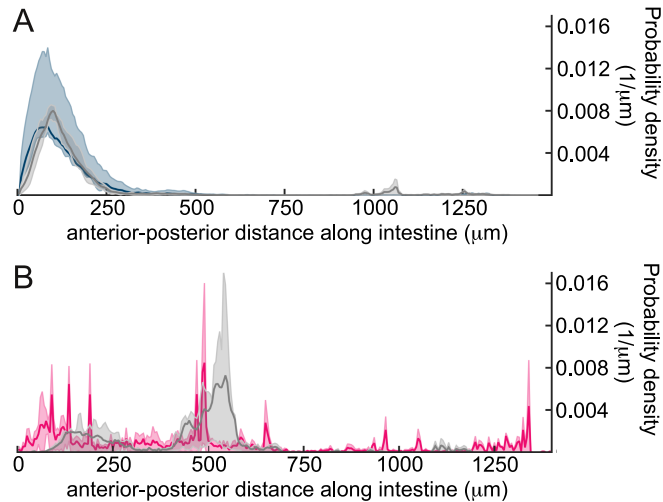

1129

1130 **S5 Fig. Spatial distribution of *Aeromonas* and *Vibrio* during mono-association or**

1131 **challenge experiments. (A) Spatial distribution of *Vibrio*, quantified as the probability**

1132 **density along the gut, for 6 dpf fish mono-associated at 5 dpf with GFP-labeled *Vibrio***

1133 **(gray) or inoculated at 4 dpf with dTomato-labeled *Aeromonas* and challenged at 5 dpf**

1134 **with GFP-labeled *Vibrio* (blue). (B) Probability density of *Aeromonas* in 6 dpf fish mono-**

1135 **associated at 5 dpf with dTomato-labeled *Aeromonas* (gray) or inoculated at 4 dpf with**

1136 **dTomato-labeled *Aeromonas* and challenged at 5 dpf with GFP-labeled *Vibrio***

1137 **(magenta). The blue and magenta spatial distributions are drawn from the same fish.**

1138 *N*=10 for both conditions.

1139

1140 **Supporting Movie Captions**

1141 **S1 Movie. Example of the motile and planktonic behavior of *Vibrio* in the zebrafish**  
1142 **gut.** Live imaging of a single optical plane in the intestinal midgut of a 6 dpf larval  
1143 zebrafish inoculated at 4 dpf with GFP-labeled *Vibrio*. Scale bar: 50  $\mu\text{m}$ .

1144

1145 **S2 Movie. Example of *Vibrio* space filling properties.** Three-dimensional scan  
1146 through the intestinal bulb of a 5 dpf larval zebrafish inoculated at 4 dpf with GFP-  
1147 labeled *Vibrio*. Scale bar: 50  $\mu\text{m}$ .

1148

1149 **S3 Movie. Example of *Vibrio* resistance to intestinal contractions.** Time-series is of  
1150 a single optical plane in the intestinal bulb of a 6 dpf larval zebrafish inoculated at 4 dpf  
1151 with GFP-labeled *Vibrio*. A subpopulation of *Vibrio* can be seen aggregating in the  
1152 anterior bulb despite repeated intestinal contractions. Scale bar: 50  $\mu\text{m}$ . Movie was  
1153 recorded at 1 frame per second.

1154

1155 **S4 Movie. Example of the non-motile and clustered behavior of *Aeromonas* in the**  
1156 **zebrafish gut.** Live imaging of a single optical plane in the intestinal midgut of a 6 dpf  
1157 larval zebrafish inoculated at 4 dpf with dTomato-labeled *Aeromonas*. Scale bar: 50  $\mu\text{m}$ .

1158

1159 **S5 Movie. Spatial distribution of *Aeromonas* in the zebrafish gut.** Three-  
1160 dimensional scan through the intestinal bulb and midgut of a 5 dpf larval zebrafish  
1161 inoculated at 4 dpf with dTomato-labeled *Aeromonas*. Bacterial clusters, individual

1162 bacteria (circled), and autofluorescent signals from intestinal mucus (gray haze) are  
1163 indicated. Scale bar: 50  $\mu\text{m}$ .

1164

1165 **S6 Movie. Example of an *Aeromonas* collapse event during *Vibrio* challenge.**

1166 Time-series is of maximum intensity projections of images taken from the same larval  
1167 zebrafish shown in Fig 3A. The fish was initially colonized at 4 dpf with *Aeromonas*  
1168 (magenta), challenged 24 hours later by inoculation with *Vibrio* (cyan), and then imaged  
1169 every 20 minutes for 14 hours. Times indicate hours post-challenge. The region shown  
1170 spans about 80% of the intestine, with the anterior on the left. Image contrast in both  
1171 color channels is enhanced for clarity. Yellow dotted line roughly indicates the luminal  
1172 boundary of the intestine; the two bacterial fluorescence channels are overlaid inside  
1173 this region. Scale bar: 200  $\mu\text{m}$ .

1174

1175 **S7 Movie. Example of *Aeromonas* sensitivity to intestinal contractions.** Time-

1176 series is of a single optical plane in the intestinal midgut of a 6 dpf larval zebrafish  
1177 inoculated at 4 dpf with dTomato-labeled *Aeromonas*. Scale bar: 50  $\mu\text{m}$ . Movie was  
1178 recorded at 1 frame per second.

1179

1180 **S8 Movie. Example of intestinal motility in a wild-type larval zebrafish.** Differential

1181 interference contrast (DIC) microscopy video of intestinal motility in a conventionally  
1182 raised 6 dpf wild-type larval zebrafish. Scale bar: 50  $\mu\text{m}$ .

1183



1184 **S9 Movie. Example of intestinal motility in a *ret* mutant larval zebrafish.** Differential  
1185 interference contrast (DIC) microscopy video of intestinal motility in a conventionally  
1186 raised 6 dpf *ret* mutant larval zebrafish. Scale bar: 50  $\mu$ m.
